# Supplementary material for: The Effect of Pine Wood Nematode Bursaphelenchus xylophilus (Steiner and Buhrer) Nickle on Intestinal Bacterial Community of Insect Vector Monochamus saltuarius (Coleoptera: Cerambycidae)
Source: MDPI journal article supplement (doi:10.3390/f13101673), 2022-10-12
Supplement: s1 [file s1]

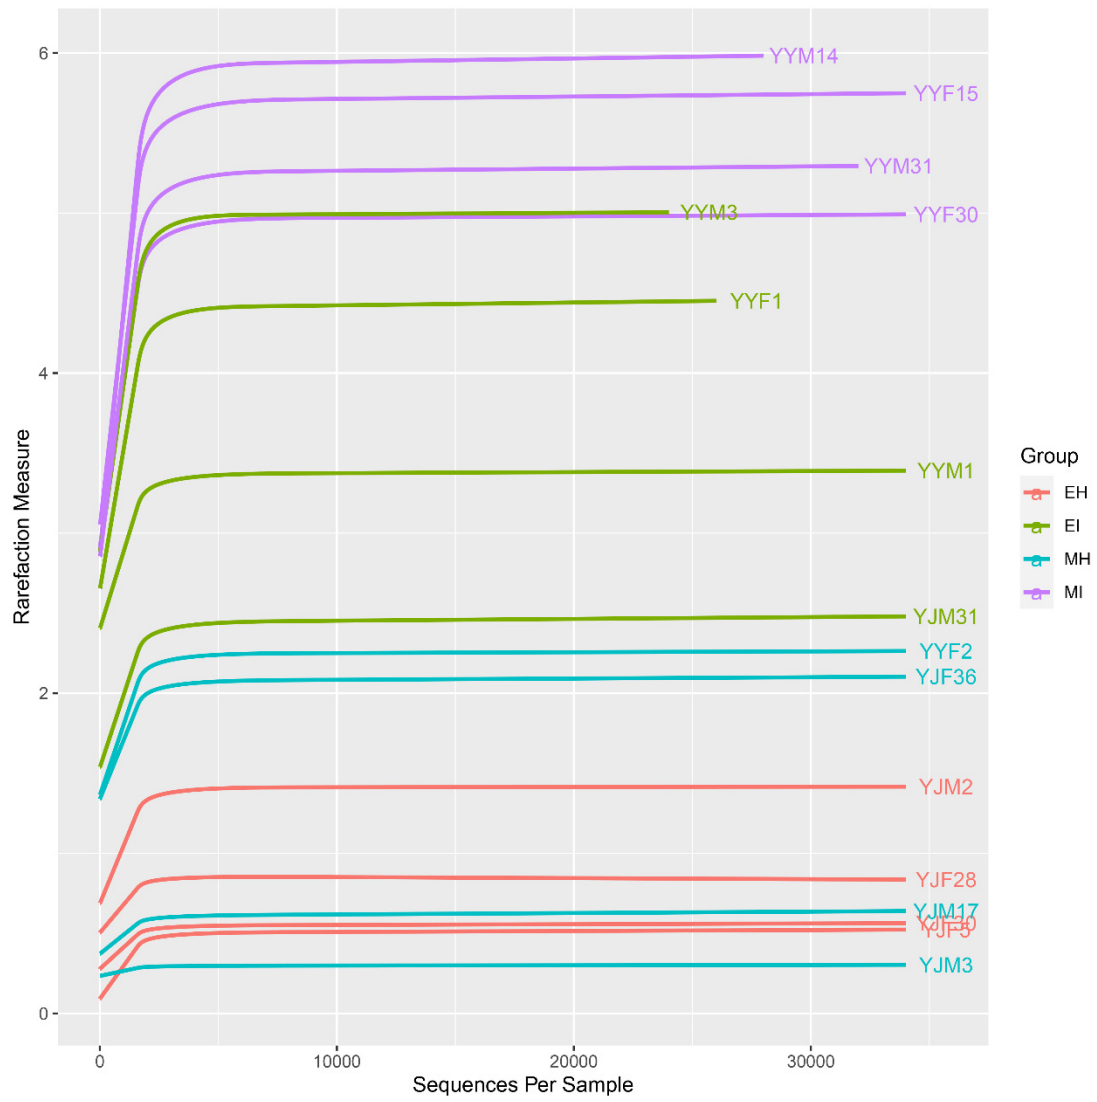

**Figure S1.** Rarefaction curves of bacterial communities in the intestinal samples of *M. saltauarius*.

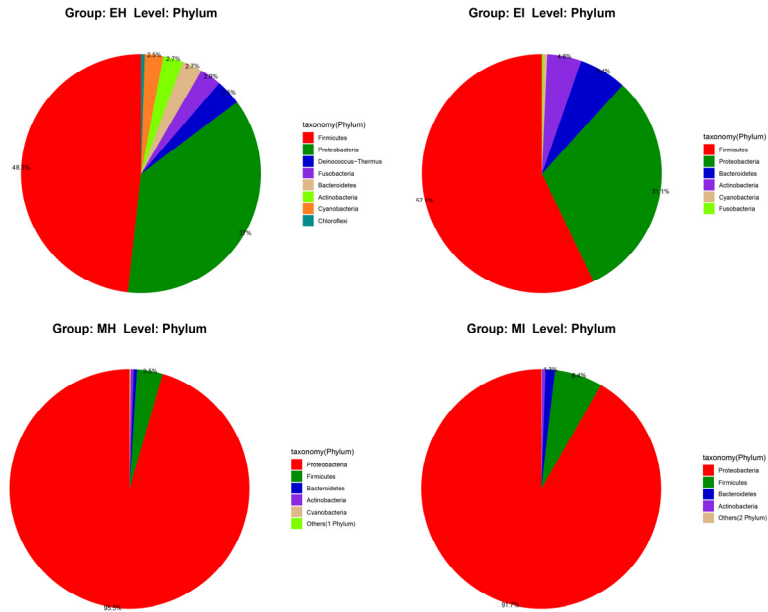

**Figure S2.** Relative abundance of dominant microbial phyla (abundance  $\geq 1\%$ ). The relative percent abundance of bacterial genera is represented by different colors.
