# Supplementary material for: The Effect of Pine Wood Nematode Bursaphelenchus xylophilus (Steiner and Buhrer) Nickle on Intestinal Bacterial Community of Insect Vector Monochamus saltuarius (Coleoptera: Cerambycidae)
Source: MDPI journal article supplement (doi:10.3390/f13101673), 2022-10-12
Supplement: s1 [file s1]

Archive with 6 entries (6 files):
- Figure Supplementary.pdf
- Supplementary Table S1.xlsx
- Supplementary Table S2.xlsx
- Supplementary Table S3.xlsx
- Supplementary Table S4.xlsx
- Supplementary Table S5.xlsx
