# Supplementary material for: The Effect of Pine Wood Nematode Bursaphelenchus xylophilus (Steiner and Buhrer) Nickle on Intestinal Bacterial Community of Insect Vector Monochamus saltuarius (Coleoptera: Cerambycidae)
Source: MDPI journal article supplement (doi:10.3390/f13101673), 2022-10-12
Supplement: s1 [file s1 › Supplementary Table S2.xlsx]

## Sheet: anova_ttest_index
Supplementary Table S2.Alpha-diversity of bacterial communities in intestine samples of M. saltuarius
index	groups	diff	lwr	upr	p adj	Sig
observed_species	EI-EH	40.75	11.0146	70.4854	0.00733422	**
observed_species	MH-EH	-5.25	-34.9854	24.4854	0.951598
observed_species	MI-EH	6	-23.7354	35.7354	0.930396
observed_species	MH-EI	-46	-75.7354	-16.2646	0.00299186	**
observed_species	MI-EI	-34.75	-64.4854	-5.01464	0.0208792	*
observed_species	MI-MH	11.25	-18.4854	40.9854	0.682886
ace	EI-EH	40.0436	15.0532	65.0339	0.00227074	**
ace	MH-EH	-1.56039	-26.5507	23.4299	0.997611
ace	MI-EH	12.2486	-12.7418	37.2389	0.49174
ace	MH-EI	-41.604	-66.5943	-16.6136	0.00166992	**
ace	MI-EI	-27.795	-52.7853	-2.80469	0.0279994	*
ace	MI-MH	13.8089	-11.1814	38.7993	0.394104
chao1	EI-EH	39.0486	16.9614	61.1358	0.00101416	**
chao1	MH-EH	-2.30208	-24.3893	19.7851	0.9892
chao1	MI-EH	10.7482	-11.339	32.8355	0.497515
chao1	MH-EI	-41.3507	-63.4379	-19.2635	0.000619907	***
chao1	MI-EI	-28.3004	-50.3876	-6.21315	0.0116228	*
chao1	MI-MH	13.0503	-9.03689	35.1375	0.340153
goods_coverage	EI-EH	-2.14488e-05	-0.000254193	0.000211295	0.992462
goods_coverage	MH-EH	-0.00013407	-0.000366814	9.86739e-05	0.360441
goods_coverage	MI-EH	-0.000242868	-0.000475612	-1.01244e-05	0.0399746	*
goods_coverage	MH-EI	-0.000112621	-0.000345365	0.000120123	0.502052
goods_coverage	MI-EI	-0.000221419	-0.000454163	1.13244e-05	0.0640795
goods_coverage	MI-MH	-0.000108798	-0.000341542	0.000123946	0.529528
shannon	EI-EH	1.72517	-0.0529498	3.50329	0.0582177
shannon	MH-EH	-3.00871	-4.78683	-1.23059	0.00146199	**
shannon	MI-EH	-2.33209	-4.11021	-0.553972	0.00993705	**
shannon	MH-EI	-4.73388	-6.512	-2.95576	2.20155e-05	***
shannon	MI-EI	-4.05726	-5.83538	-2.27914	0.000100879	***
shannon	MI-MH	0.676617	-1.1015	2.45474	0.679142
simpson	EI-EH	0.158242	-0.197922	0.514406	0.568994
simpson	MH-EH	-0.634361	-0.990525	-0.278197	0.000952402	***
simpson	MI-EH	-0.430151	-0.786315	-0.0739865	0.0170353	*
simpson	MH-EI	-0.792603	-1.14877	-0.436439	0.000128077	***
simpson	MI-EI	-0.588393	-0.944557	-0.232229	0.00177773	**
simpson	MI-MH	0.20421	-0.151954	0.560374	0.364193
