# Supplementary material for: The Effect of Pine Wood Nematode Bursaphelenchus xylophilus (Steiner and Buhrer) Nickle on Intestinal Bacterial Community of Insect Vector Monochamus saltuarius (Coleoptera: Cerambycidae)
Source: MDPI journal article supplement (doi:10.3390/f13101673), 2022-10-12
Supplement: s1 [file s1 › Supplementary Table S3.xlsx]

## Sheet: Phylum
N	taxonomy	YYF1	YYM1	YJM2	YYF2	YJM3	YYM3	YJF5	YYM14	YYF15	YJM17	YJF28	YJF30	YYF30	YJM31	YYM31	YJF36
1	p__Actinobacteria	4.7394	1.4514	1.1019	1.4897	0.169	3.1737	0.0806	4.9219	7.4813	0.0499	0.2994	0.3034	2.5174	0.6372	3.5639	1.0326
2	p__Bacteroidetes	5.5037	0.8255	1.1711	0.8869	0.0768	3.6584	0.2456	7.8106	7.6156	0.2689	0.3033	1.183	8.1546	2.0804	2.1061	1.5738
3	p__Chloroflexi	0.6529	0.192	0	0.096	0	1.1194	0	0	0	0	0	0	0	0	0	0
4	p__Cyanobacteria	9.3329	0.4915	0.0883	0.0499	0	0	0.3071	0.0115	0	0	0.1075	0.1229	0	0	1.9795	0.0077
5	p__Deinococcus-Thermus	0	0	0	0	0	13.8604	0	0	0	0	0	0	0	0	0	0
6	p__Firmicutes	38.4107	55.9284	8.0323	84.1089	0.7184	14.5066	1.5545	70.1385	52.0123	1.4945	3.5241	2.6118	41.099	13.676	65.1744	7.9917
7	p__Fusobacteria	6.5445	2.2577	0.1075	1.5549	0	1.2156	0	0.046	0.5448	0	0	0.0422	0.2533	0.0115	0	0.0921
8	p__Proteobacteria	34.8158	38.8535	89.4989	11.8137	99.0357	62.4659	97.8122	17.0714	32.3461	98.1866	95.7657	95.7367	47.9757	83.595	27.1761	89.3022

## Sheet: Class
N	taxonomy	YYF1	YYM1	YJM2	YYF2	YJM3	YYM3	YJF5	YYM14	YYF15	YJM17	YJF28	YJF30	YYF30	YJM31	YYM31	YJF36
1	p__Actinobacteria; c__Actinobacteria	4.6319	1.436	0.4915	1.4897	0.0922	3.0775	0.0614	3.5217	4.4619	0.0499	0.2035	0.0768	1.0208	0.4261	2.0908	0.2073
2	p__Actinobacteria; c__Coriobacteriia	0.1075	0.0154	0.6105	0	0.0768	0.0962	0.0192	1.4002	3.0194	0	0.096	0.2266	1.4966	0.2111	1.4731	0.8253
3	p__Bacteroidetes; c__Bacteroidia	5.5037	0.8255	1.1711	0.8869	0.0768	3.6584	0.2456	7.8106	7.6156	0.2689	0.3033	1.183	8.1546	2.0804	2.1061	1.5738
4	p__Chloroflexi; c__KD4-96	0.6491	0.1305	0	0.0883	0	0.3924	0	0	0	0	0	0	0	0	0	0
5	p__Chloroflexi; c__Ktedonobacteria	0.0038	0.0614	0	0.0077	0	0.7271	0	0	0	0	0	0	0	0	0	0
6	p__Cyanobacteria; c__Oxyphotobacteria	9.3329	0.4915	0.0883	0.0499	0	0	0.3071	0.0115	0	0	0.1075	0.1229	0	0	1.9795	0.0077
7	p__Deinococcus-Thermus; c__Deinococci	0	0	0	0	0	13.8604	0	0	0	0	0	0	0	0	0	0
8	p__Firmicutes; c__Bacilli	34.8274	54.7113	0.0768	82.8688	0.0192	13.4718	0.2495	5.9616	1.1279	0.1537	0.4683	0.073	1.6885	1.7963	8.8234	0.6333
9	p__Firmicutes; c__Clostridia	3.5834	1.2133	6.5425	1.2324	0.6416	1.0348	1.0709	52.4303	43.6217	1.1334	2.4876	2.0049	29.744	9.9259	49.0352	5.6925
10	p__Firmicutes; c__Erysipelotrichia	0	0.0038	1.052	0.0077	0.0461	0	0.0729	7.6073	5.4172	0.096	0.3647	0.3764	6.0593	1.1477	3.2762	1.0057
11	p__Firmicutes; c__Negativicutes	0	0	0.3609	0	0.0115	0	0.1612	4.1393	1.8454	0.1114	0.2035	0.1575	3.6072	0.806	4.0396	0.6602
12	p__Fusobacteria; c__Fusobacteriia	6.5445	2.2577	0.1075	1.5549	0	1.2156	0	0.046	0.5448	0	0	0.0422	0.2533	0.0115	0	0.0921
13	p__Proteobacteria; c__Alphaproteobacteria	7.908	3.8358	1.363	2.7989	0.219	23.3545	1.067	8.5088	23.0424	0.1153	2.192	0.3073	38.4627	2.9747	25.726	0.3148
14	p__Proteobacteria; c__Gammaproteobacteria	26.9079	35.0177	88.1359	9.0148	98.8167	39.1114	96.7452	8.5626	9.3037	98.0714	93.5736	95.4294	9.513	80.6203	1.4501	88.9874

## Sheet: Order
N	taxonomy	YYF1	YYM1	YJM2	YYF2	YJM3	YYM3	YJF5	YYM14	YYF15	YJM17	YJF28	YJF30	YYF30	YJM31	YYM31	YJF36
1	p__Actinobacteria; c__Actinobacteria; o__Actinomycetales	1.7744	0.5222	0	0.8139	0	0.5193	0	0	0	0	0	0	0	0	0	0
2	p__Actinobacteria; c__Actinobacteria; o__Bifidobacteriales	0.0422	0.0077	0.4915	0.0422	0.0922	0.0769	0.0614	2.5089	2.8122	0.0461	0.1958	0.0461	0.9325	0.403	1.7915	0.1804
3	p__Actinobacteria; c__Actinobacteria; o__Corynebacteriales	2.6001	0.814	0	0.5797	0	1.9504	0	0.8095	1.2239	0.0038	0.0077	0.0269	0.0883	0.023	0.2532	0.0269
4	p__Actinobacteria; c__Actinobacteria; o__Frankiales	0.2036	0.0922	0	0.0538	0	0.5116	0	0	0	0	0	0	0	0	0	0
5	p__Actinobacteria; c__Actinobacteria; o__Micrococcales	0.0115	0	0	0	0	0.0192	0	0.2033	0.4259	0	0	0.0038	0	0	0.046	0
6	p__Actinobacteria; c__Coriobacteriia; o__Coriobacteriales	0.1075	0.0154	0.6105	0	0.0768	0.0962	0.0192	1.4002	3.0194	0	0.096	0.2266	1.4966	0.2111	1.4731	0.8253
7	p__Bacteroidetes; c__Bacteroidia; o__Bacteroidales	4.724	0.7372	1.1711	0.5682	0.0768	0.7078	0.2418	7.803	7.6041	0.2689	0.3033	1.183	8.1546	2.0612	2.1061	1.5699
8	p__Bacteroidetes; c__Bacteroidia; o__Chitinophagales	0.2535	0.0806	0	0.0883	0	0.8386	0	0	0	0	0	0	0	0	0	0
9	p__Bacteroidetes; c__Bacteroidia; o__Cytophagales	0	0	0	0	0	2.085	0	0	0	0	0	0	0	0	0	0
10	p__Bacteroidetes; c__Bacteroidia; o__Flavobacteriales	0.5262	0.0077	0	0.2304	0	0.0269	0.0038	0.0077	0.0115	0	0	0	0	0.0192	0	0.0038
11	p__Chloroflexi; c__KD4-96; o__uncultured bacterium	0.6491	0.1305	0	0.0883	0	0.3924	0	0	0	0	0	0	0	0	0	0
12	p__Chloroflexi; c__Ktedonobacteria; o__Ktedonobacterales	0.0038	0.0614	0	0.0077	0	0.7271	0	0	0	0	0	0	0	0	0	0
13	p__Cyanobacteria; c__Oxyphotobacteria; o__Chloroplast	9.3329	0.4915	0.0883	0.0499	0	0	0.3071	0.0115	0	0	0.1075	0.1229	0	0	1.9795	0.0077
14	p__Deinococcus-Thermus; c__Deinococci; o__Deinococcales	0	0	0	0	0	13.8604	0	0	0	0	0	0	0	0	0	0
15	p__Firmicutes; c__Bacilli; o__Bacillales	0.6222	0.2035	0	0.1382	0	0.1039	0.0345	0.1266	0	0	0	0.0077	0.4336	0.0844	0.0575	0.5873
16	p__Firmicutes; c__Bacilli; o__Lactobacillales	34.2052	54.5078	0.0768	82.7306	0.0192	13.368	0.2149	5.835	1.1279	0.1537	0.4683	0.0653	1.2548	1.7119	8.7659	0.0461
17	p__Firmicutes; c__Clostridia; o__Clostridiales	3.5834	1.2133	6.5425	1.2324	0.6416	1.0348	1.0709	52.4303	43.6217	1.1334	2.4876	2.0049	29.744	9.9259	49.0352	5.6925
18	p__Firmicutes; c__Erysipelotrichia; o__Erysipelotrichales	0	0.0038	1.052	0.0077	0.0461	0	0.0729	7.6073	5.4172	0.096	0.3647	0.3764	6.0593	1.1477	3.2762	1.0057
19	p__Firmicutes; c__Negativicutes; o__Selenomonadales	0	0	0.3609	0	0.0115	0	0.1612	4.1393	1.8454	0.1114	0.2035	0.1575	3.6072	0.806	4.0396	0.6602
20	p__Fusobacteria; c__Fusobacteriia; o__Fusobacteriales	6.5445	2.2577	0.1075	1.5549	0	1.2156	0	0.046	0.5448	0	0	0.0422	0.2533	0.0115	0	0.0921
21	p__Proteobacteria; c__Alphaproteobacteria; o__Caulobacterales	1.7014	1.1212	1.2094	0.5836	0.1921	2.0812	0.9327	7.2697	17.5446	0.0231	1.9079	0.2689	34.9745	2.7291	20.666	0.2572
22	p__Proteobacteria; c__Alphaproteobacteria; o__Rhizobiales	1.9856	1.0137	0.0461	1.0635	0.0038	10.3058	0.0652	0.3376	0.6138	0.0154	0.0845	0.0192	0.6754	0.0115	0.4604	0
23	p__Proteobacteria; c__Alphaproteobacteria; o__Rhodobacterales	2.7615	1.0175	0.0115	0.9829	0	2.8159	0	0.3107	2.981	0.0038	0.0422	0.0038	0.0307	0	1.7647	0.0038
24	p__Proteobacteria; c__Alphaproteobacteria; o__Rickettsiales	0.9563	0.3341	0.0077	0.1037	0.0038	1.1502	0.023	0.1343	0.2724	0.0077	0.0461	0.0038	0.6716	0.0691	0.3299	0.0154
25	p__Proteobacteria; c__Alphaproteobacteria; o__Sphingomonadales	0.0807	0.0346	0.0883	0.0614	0.0192	6.2204	0.0461	0.4565	1.6305	0.0653	0.1113	0.0115	2.1106	0.165	2.5051	0.0384
26	p__Proteobacteria; c__Alphaproteobacteria; o__uncultured	0.4225	0.3149	0	0.0038	0	0.7809	0	0	0	0	0	0	0	0	0	0
27	p__Proteobacteria; c__Gammaproteobacteria; o__Beggiatoales	0.3265	0.2189	0	0.1421	0	0.3116	0	0	0	0	0	0	0	0	0	0
28	p__Proteobacteria; c__Gammaproteobacteria; o__Betaproteobacteriales	17.1487	6.1319	0.0038	5.2868	0	25.301	0	0.6867	0.1381	0.0077	0.1075	0	0.8135	0.0576	0.1381	0.0077
29	p__Proteobacteria; c__Gammaproteobacteria; o__Enterobacteriales	0.0077	0.0384	88.0975	0.0614	98.809	0.0038	96.7299	1.8107	2.4439	98.0214	93.2972	95.3334	6.044	80.3209	0.7596	88.9068
30	p__Proteobacteria; c__Gammaproteobacteria; o__Pseudomonadales	8.5494	5.7672	0.0269	3.2596	0.0077	12.6601	0.0154	5.8541	6.1155	0.0384	0.1689	0.0922	2.6555	0.2341	0.4143	0.0729
31	p__Proteobacteria; c__Gammaproteobacteria; o__Xanthomonadales	0.8757	22.8613	0.0077	0.2649	0	0.8348	0	0.211	0.6062	0.0038	0	0.0038	0	0.0077	0.1381	0

## Sheet: Family
N	taxonomy	YYF1	YYM1	YJM2	YYF2	YJM3	YYM3	YJF5	YYM14	YYF15	YJM17	YJF28	YJF30	YYF30	YJM31	YYM31	YJF36
1	p__Actinobacteria; c__Actinobacteria; o__Actinomycetales; f__Actinomycetaceae	1.7744	0.5222	0	0.8139	0	0.5193	0	0	0	0	0	0	0	0	0	0
2	p__Actinobacteria; c__Actinobacteria; o__Bifidobacteriales; f__Bifidobacteriaceae	0.0422	0.0077	0.4915	0.0422	0.0922	0.0769	0.0614	2.5089	2.8122	0.0461	0.1958	0.0461	0.9325	0.403	1.7915	0.1804
3	p__Actinobacteria; c__Actinobacteria; o__Corynebacteriales; f__Corynebacteriaceae	1.2098	0.4953	0	0.288	0	0.904	0	0.702	1.0857	0	0	0.023	0.0115	0.023	0.2532	0.0154
4	p__Actinobacteria; c__Actinobacteria; o__Corynebacteriales; f__Nocardiaceae	1.3903	0.3187	0	0.2918	0	1.0464	0	0.1074	0.1381	0.0038	0.0077	0.0038	0.0767	0	0	0.0115
5	p__Actinobacteria; c__Actinobacteria; o__Frankiales; f__Acidothermaceae	0.2036	0.0922	0	0.0538	0	0.5116	0	0	0	0	0	0	0	0	0	0
6	p__Actinobacteria; c__Actinobacteria; o__Micrococcales; f__Microbacteriaceae	0.0115	0	0	0	0	0.0192	0	0.2033	0.4259	0	0	0.0038	0	0	0.046	0
7	p__Actinobacteria; c__Coriobacteriia; o__Coriobacteriales; f__Coriobacteriaceae	0.1075	0.0154	0.5721	0	0.073	0.0962	0.0154	1.1202	2.7623	0	0.0845	0.2036	1.3738	0.1996	0.6637	0.7331
8	p__Actinobacteria; c__Coriobacteriia; o__Coriobacteriales; f__Eggerthellaceae	0	0	0.0384	0	0.0038	0	0.0038	0.28	0.257	0	0.0115	0.023	0.1228	0.0115	0.8095	0.0921
9	p__Bacteroidetes; c__Bacteroidia; o__Bacteroidales; f__Bacteroidaceae	3.8906	0.5568	0.1805	0.3379	0.0231	0.6617	0.0384	0.9629	1.4963	0.0461	0.0729	0.0845	1.1743	0.1919	0.1266	0.1305
10	p__Bacteroidetes; c__Bacteroidia; o__Bacteroidales; f__Porphyromonadaceae	0.8334	0.1805	0	0.2265	0	0.0462	0	0	0	0	0	0	0	0	0	0
11	p__Bacteroidetes; c__Bacteroidia; o__Bacteroidales; f__Prevotellaceae	0	0	0.9906	0.0038	0.0538	0	0.2034	6.8401	6.1078	0.2228	0.2303	1.0985	6.9803	1.8693	1.9795	1.4394
12	p__Bacteroidetes; c__Bacteroidia; o__Chitinophagales; f__Chitinophagaceae	0.2535	0.0806	0	0.0883	0	0.8386	0	0	0	0	0	0	0	0	0	0
13	p__Bacteroidetes; c__Bacteroidia; o__Cytophagales; f__Hymenobacteraceae	0	0	0	0	0	2.085	0	0	0	0	0	0	0	0	0	0
14	p__Bacteroidetes; c__Bacteroidia; o__Flavobacteriales; f__Weeksellaceae	0.5262	0.0077	0	0.2304	0	0.0269	0.0038	0.0077	0.0115	0	0	0	0	0.0192	0	0.0038
15	p__Chloroflexi; c__KD4-96; o__uncultured bacterium; f__uncultured bacterium	0.6491	0.1305	0	0.0883	0	0.3924	0	0	0	0	0	0	0	0	0	0
16	p__Chloroflexi; c__Ktedonobacteria; o__Ktedonobacterales; f__JG30-KF-AS9	0.0038	0.0614	0	0.0077	0	0.7271	0	0	0	0	0	0	0	0	0	0
17	p__Cyanobacteria; c__Oxyphotobacteria; o__Chloroplast; f__Allium ampeloprasum (leek)	0.2228	0	0.0768	0.0077	0	0	0.2687	0	0	0	0.0998	0	0	0	0	0
18	p__Cyanobacteria; c__Oxyphotobacteria; o__Chloroplast; f__Elodea nuttallii	0	0.4915	0	0	0	0	0	0	0	0	0	0	0	0	0	0
19	p__Cyanobacteria; c__Oxyphotobacteria; o__Chloroplast; f__Pinus sylvestris (Scots pine)	8.4149	0	0.0115	0.0422	0	0	0.0192	0	0	0	0.0077	0.1229	0	0	0.0537	0.0077
20	p__Cyanobacteria; c__Oxyphotobacteria; o__Chloroplast; f__taxa	0.6952	0	0	0	0	0	0.0192	0.0115	0	0	0	0	0	0	1.9258	0
21	p__Deinococcus-Thermus; c__Deinococci; o__Deinococcales; f__Deinococcaceae	0	0	0	0	0	13.8604	0	0	0	0	0	0	0	0	0	0
22	p__Firmicutes; c__Bacilli; o__Bacillales; f__Bacillaceae	0.1882	0.0154	0	0.0115	0	0	0.0345	0	0	0	0	0.0077	0	0.0844	0	0.5834
23	p__Firmicutes; c__Bacilli; o__Bacillales; f__Family XII	0	0	0	0.0691	0	0.1039	0	0.0729	0	0	0	0	0.4336	0	0	0
24	p__Firmicutes; c__Bacilli; o__Bacillales; f__Staphylococcaceae	0.434	0.1881	0	0.0576	0	0	0	0.0537	0	0	0	0	0	0	0.0575	0.0038
25	p__Firmicutes; c__Bacilli; o__Lactobacillales; f__Enterococcaceae	0.0077	0.0077	0.0038	0.0115	0	0	0	0.1036	0	0	0.023	0	0.2494	0	0.3299	0
26	p__Firmicutes; c__Bacilli; o__Lactobacillales; f__Lactobacillaceae	2.2967	10.4477	0.0038	14.9697	0	1.1964	0.1382	3.0844	0.6215	0.1229	0.3301	0.0538	0.7368	1.1208	5.413	0.0269
27	p__Firmicutes; c__Bacilli; o__Lactobacillales; f__Leuconostocaceae	30.7524	43.9909	0	67.6879	0	11.6369	0	0.1688	0.1036	0	0	0	0.2686	0	0.0384	0.0077
28	p__Firmicutes; c__Bacilli; o__Lactobacillales; f__Streptococcaceae	1.1484	0.0614	0.0691	0.0614	0.0192	0.5347	0.0768	2.4782	0.4028	0.0307	0.1152	0.0115	0	0.5911	2.9846	0.0115
29	p__Firmicutes; c__Clostridia; o__Clostridiales; f__Christensenellaceae	0.0077	0	0.0307	0	0.0038	0	0.0077	0.188	0.0192	0	0	0.0077	0.0537	0.0422	0.3606	0.023
30	p__Firmicutes; c__Clostridia; o__Clostridiales; f__Clostridiaceae 1	0.1191	0.0576	0.0384	0.0269	0	0	0	0.1074	0.353	0	0	0.0115	0.3761	0.0038	0	0
31	p__Firmicutes; c__Clostridia; o__Clostridiales; f__Family XI	2.2583	0.7718	0	0.6796	0	0.4385	0	0	0	0	0	0	0	0	0	0
32	p__Firmicutes; c__Clostridia; o__Clostridiales; f__Lachnospiraceae	0.1037	0.0653	4.0968	0.238	0.3304	0.2962	0.5489	29.9958	31.5711	0.6224	1.4012	1.014	15.6491	4.3066	25.1506	3.6504
33	p__Firmicutes; c__Clostridia; o__Clostridiales; f__Peptostreptococcaceae	0.9909	0.3033	0.2419	0.215	0.0307	0.2693	0.0154	0.5064	0.4527	0	0.0307	0.0307	0.3876	0.0307	0.0806	0.0038
34	p__Firmicutes; c__Clostridia; o__Clostridiales; f__Ruminococcaceae	0.1037	0.0154	2.1348	0.0729	0.2766	0.0308	0.499	21.6327	11.2258	0.511	1.0557	0.941	13.2776	5.5425	23.4434	2.0152
35	p__Firmicutes; c__Erysipelotrichia; o__Erysipelotrichales; f__Erysipelotrichaceae	0	0.0038	1.052	0.0077	0.0461	0	0.0729	7.6073	5.4172	0.096	0.3647	0.3764	6.0593	1.1477	3.2762	1.0057
36	p__Firmicutes; c__Negativicutes; o__Selenomonadales; f__Acidaminococcaceae	0	0	0.1421	0	0.0077	0	0.0307	0.4028	0.6829	0.0231	0.0269	0.0576	1.2932	0.1535	0.3606	0.3762
37	p__Firmicutes; c__Negativicutes; o__Selenomonadales; f__Veillonellaceae	0	0	0.2189	0	0.0038	0	0.1305	3.7365	1.1625	0.0884	0.1766	0.0999	2.314	0.6525	3.679	0.284
38	p__Fusobacteria; c__Fusobacteriia; o__Fusobacteriales; f__Fusobacteriaceae	4.5051	1.7394	0.1075	1.3707	0	0.8848	0	0.046	0.5448	0	0	0.0422	0.2533	0.0115	0	0.0921
39	p__Fusobacteria; c__Fusobacteriia; o__Fusobacteriales; f__Leptotrichiaceae	2.0394	0.5184	0	0.1843	0	0.3308	0	0	0	0	0	0	0	0	0	0
40	p__Proteobacteria; c__Alphaproteobacteria; o__Caulobacterales; f__Caulobacteraceae	1.7014	1.1212	1.2094	0.5836	0.1921	2.0812	0.9327	7.2697	17.5446	0.0231	1.9079	0.2689	34.9745	2.7291	20.666	0.2572
41	p__Proteobacteria; c__Alphaproteobacteria; o__Rhizobiales; f__Beijerinckiaceae	0.0192	0.1267	0.0115	0.1651	0	5.578	0	0.0767	0.2302	0	0.0077	0.0038	0	0	0.0499	0
42	p__Proteobacteria; c__Alphaproteobacteria; o__Rhizobiales; f__Xanthobacteraceae	1.9664	0.887	0.0346	0.8984	0.0038	4.7278	0.0652	0.2609	0.3837	0.0154	0.0768	0.0154	0.6754	0.0115	0.4105	0
43	p__Proteobacteria; c__Alphaproteobacteria; o__Rhodobacterales; f__Rhodobacteraceae	2.7615	1.0175	0.0115	0.9829	0	2.8159	0	0.3107	2.981	0.0038	0.0422	0.0038	0.0307	0	1.7647	0.0038
44	p__Proteobacteria; c__Alphaproteobacteria; o__Rickettsiales; f__Mitochondria	0.9563	0.3341	0.0077	0.1037	0.0038	1.1502	0.023	0.1343	0.2724	0.0077	0.0461	0.0038	0.6716	0.0691	0.3299	0.0154
45	p__Proteobacteria; c__Alphaproteobacteria; o__Sphingomonadales; f__Sphingomonadaceae	0.0807	0.0346	0.0883	0.0614	0.0192	6.2204	0.0461	0.4565	1.6305	0.0653	0.1113	0.0115	2.1106	0.165	2.5051	0.0384
46	p__Proteobacteria; c__Alphaproteobacteria; o__uncultured; f__uncultured bacterium	0.4225	0.3149	0	0.0038	0	0.7809	0	0	0	0	0	0	0	0	0	0
47	p__Proteobacteria; c__Gammaproteobacteria; o__Beggiatoales; f__Beggiatoaceae	0.3265	0.2189	0	0.1421	0	0.3116	0	0	0	0	0	0	0	0	0	0
48	p__Proteobacteria; c__Gammaproteobacteria; o__Betaproteobacteriales; f__Burkholderiaceae	16.6571	5.7326	0.0038	5.091	0	23.8969	0	0.6867	0.1381	0.0077	0.0998	0	0.8097	0.0576	0.0882	0.0077
49	p__Proteobacteria; c__Gammaproteobacteria; o__Betaproteobacteriales; f__Hydrogenophilaceae	0.4916	0.3993	0	0.1958	0	1.4041	0	0	0	0	0.0077	0	0.0038	0	0.0499	0
50	p__Proteobacteria; c__Gammaproteobacteria; o__Enterobacteriales; f__Enterobacteriaceae	0.0077	0.0384	88.0975	0.0614	98.809	0.0038	96.7299	1.8107	2.4439	98.0214	93.2972	95.3334	6.044	80.3209	0.7596	88.9068
51	p__Proteobacteria; c__Gammaproteobacteria; o__Pseudomonadales; f__Moraxellaceae	8.5378	5.7518	0.0269	3.2519	0.0077	12.6601	0.0154	4.0473	6.1155	0.0384	0.1689	0.0922	1.1973	0.2341	0.4143	0.0729
52	p__Proteobacteria; c__Gammaproteobacteria; o__Pseudomonadales; f__Pseudomonadaceae	0.0115	0.0154	0	0.0077	0	0	0	1.8069	0	0	0	0	1.4582	0	0	0
53	p__Proteobacteria; c__Gammaproteobacteria; o__Xanthomonadales; f__Xanthomonadaceae	0.8757	22.8613	0.0077	0.2649	0	0.8348	0	0.211	0.6062	0.0038	0	0.0038	0	0.0077	0.1381	0

## Sheet: Genus
N	taxonomy	YYF1	YYM1	YJM2	YYF2	YJM3	YYM3	YJF5	YYM14	YYF15	YJM17	YJF28	YJF30	YYF30	YJM31	YYM31	YJF36
1	p__Actinobacteria; c__Actinobacteria; o__Actinomycetales; f__Actinomycetaceae; g__Trueperella	1.7744	0.5222	0	0.8139	0	0.5193	0	0	0	0	0	0	0	0	0	0
2	p__Actinobacteria; c__Actinobacteria; o__Bifidobacteriales; f__Bifidobacteriaceae; g__Bifidobacterium	0.0422	0.0077	0.4915	0.0422	0.0922	0.0769	0.0614	2.5089	2.8122	0.0461	0.1958	0.0461	0.9325	0.403	1.7915	0.1804
3	p__Actinobacteria; c__Actinobacteria; o__Corynebacteriales; f__Corynebacteriaceae; g__Corynebacterium 1	1.2098	0.4953	0	0.288	0	0.904	0	0.702	1.0857	0	0	0.023	0.0115	0.023	0.2532	0.0154
4	p__Actinobacteria; c__Actinobacteria; o__Corynebacteriales; f__Nocardiaceae; g__Rhodococcus	1.3903	0.3187	0	0.2918	0	1.0464	0	0.1074	0.1381	0.0038	0.0077	0.0038	0.0767	0	0	0.0115
5	p__Actinobacteria; c__Actinobacteria; o__Frankiales; f__Acidothermaceae; g__Acidothermus	0.2036	0.0922	0	0.0538	0	0.5116	0	0	0	0	0	0	0	0	0	0
6	p__Actinobacteria; c__Actinobacteria; o__Micrococcales; f__Microbacteriaceae; g__Leucobacter	0.0115	0	0	0	0	0.0192	0	0.2033	0.4259	0	0	0.0038	0	0	0.046	0
7	p__Actinobacteria; c__Coriobacteriia; o__Coriobacteriales; f__Coriobacteriaceae; g__Collinsella	0.1075	0.0154	0.5721	0	0.073	0.0962	0.0154	1.1202	2.7623	0	0.0845	0.2036	1.3738	0.1996	0.6637	0.7331
8	p__Actinobacteria; c__Coriobacteriia; o__Coriobacteriales; f__Eggerthellaceae; g__Senegalimassilia	0	0	0.0384	0	0.0038	0	0.0038	0.28	0.257	0	0.0115	0.023	0.1228	0.0115	0.8095	0.0921
9	p__Bacteroidetes; c__Bacteroidia; o__Bacteroidales; f__Bacteroidaceae; g__Bacteroides	3.8906	0.5568	0.1805	0.3379	0.0231	0.6617	0.0384	0.9629	1.4963	0.0461	0.0729	0.0845	1.1743	0.1919	0.1266	0.1305
10	p__Bacteroidetes; c__Bacteroidia; o__Bacteroidales; f__Porphyromonadaceae; g__Porphyromonas	0.8334	0.1805	0	0.2265	0	0.0462	0	0	0	0	0	0	0	0	0	0
11	p__Bacteroidetes; c__Bacteroidia; o__Bacteroidales; f__Prevotellaceae; g__Alloprevotella	0	0	0.2457	0.0038	0.0115	0	0.0384	1.4002	1.6958	0.0653	0.142	0.2036	1.3201	0.7523	0.8517	0.3608
12	p__Bacteroidetes; c__Bacteroidia; o__Bacteroidales; f__Prevotellaceae; g__Prevotella 2	0	0	0.0461	0	0	0	0.0652	3.092	0.0882	0.0615	0.0307	0.0384	0.1765	0.3416	0.6713	0.0844
13	p__Bacteroidetes; c__Bacteroidia; o__Bacteroidales; f__Prevotellaceae; g__Prevotella 9	0	0	0.6988	0	0.0423	0	0.0998	2.3478	4.3238	0.096	0.0576	0.8565	5.4837	0.7753	0.4565	0.9942
14	p__Bacteroidetes; c__Bacteroidia; o__Chitinophagales; f__Chitinophagaceae; g__Hydrotalea	0.2535	0.0806	0	0.0883	0	0.8386	0	0	0	0	0	0	0	0	0	0
15	p__Bacteroidetes; c__Bacteroidia; o__Cytophagales; f__Hymenobacteraceae; g__Hymenobacter	0	0	0	0	0	2.085	0	0	0	0	0	0	0	0	0	0
16	p__Bacteroidetes; c__Bacteroidia; o__Flavobacteriales; f__Weeksellaceae; g__Chryseobacterium	0.5262	0.0077	0	0.2304	0	0.0269	0.0038	0.0077	0.0115	0	0	0	0	0.0192	0	0.0038
17	p__Chloroflexi; c__KD4-96; o__uncultured bacterium; f__uncultured bacterium; g__uncultured bacterium	0.6491	0.1305	0	0.0883	0	0.3924	0	0	0	0	0	0	0	0	0	0
18	p__Chloroflexi; c__Ktedonobacteria; o__Ktedonobacterales; f__JG30-KF-AS9; g__uncultured bacterium	0.0038	0.0614	0	0.0077	0	0.7271	0	0	0	0	0	0	0	0	0	0
19	p__Cyanobacteria; c__Oxyphotobacteria; o__Chloroplast; f__Allium ampeloprasum (leek); g__Allium ampeloprasum (leek)	0.2228	0	0.0768	0.0077	0	0	0.2687	0	0	0	0.0998	0	0	0	0	0
20	p__Cyanobacteria; c__Oxyphotobacteria; o__Chloroplast; f__Elodea nuttallii; g__Elodea nuttallii	0	0.4915	0	0	0	0	0	0	0	0	0	0	0	0	0	0
21	p__Cyanobacteria; c__Oxyphotobacteria; o__Chloroplast; f__Pinus sylvestris (Scots pine); g__Pinus sylvestris (Scots pine)	8.4149	0	0.0115	0.0422	0	0	0.0192	0	0	0	0.0077	0.1229	0	0	0.0537	0.0077
22	p__Cyanobacteria; c__Oxyphotobacteria; o__Chloroplast; f__taxa; g__taxa	0.6952	0	0	0	0	0	0.0192	0.0115	0	0	0	0	0	0	1.9258	0
23	p__Deinococcus-Thermus; c__Deinococci; o__Deinococcales; f__Deinococcaceae; g__Deinococcus	0	0	0	0	0	13.8604	0	0	0	0	0	0	0	0	0	0
24	p__Firmicutes; c__Bacilli; o__Bacillales; f__Bacillaceae; g__Bacillus	0.1882	0.0154	0	0.0115	0	0	0.0345	0	0	0	0	0.0077	0	0.0844	0	0.5834
25	p__Firmicutes; c__Bacilli; o__Bacillales; f__Family XII; g__Exiguobacterium	0	0	0	0.0691	0	0.1039	0	0.0729	0	0	0	0	0.4336	0	0	0
26	p__Firmicutes; c__Bacilli; o__Bacillales; f__Staphylococcaceae; g__Staphylococcus	0.434	0.1881	0	0.0576	0	0	0	0.0537	0	0	0	0	0	0	0.0575	0.0038
27	p__Firmicutes; c__Bacilli; o__Lactobacillales; f__Enterococcaceae; g__Enterococcus	0.0077	0.0077	0.0038	0.0115	0	0	0	0.1036	0	0	0.023	0	0.2494	0	0.3299	0
28	p__Firmicutes; c__Bacilli; o__Lactobacillales; f__Lactobacillaceae; g__Lactobacillus	2.2967	10.4477	0.0038	14.9697	0	1.1964	0.1382	3.0844	0.6215	0.1229	0.3301	0.0538	0.7368	1.1208	5.413	0.0269
29	p__Firmicutes; c__Bacilli; o__Lactobacillales; f__Leuconostocaceae; g__Weissella	30.7524	43.9909	0	67.6879	0	11.6369	0	0.1688	0.1036	0	0	0	0.2686	0	0.0384	0.0077
30	p__Firmicutes; c__Bacilli; o__Lactobacillales; f__Streptococcaceae; g__Streptococcus	1.1484	0.0614	0.0691	0.0614	0.0192	0.5347	0.0768	2.4782	0.4028	0.0307	0.1152	0.0115	0	0.5911	2.9846	0.0115
31	p__Firmicutes; c__Clostridia; o__Clostridiales; f__Christensenellaceae; g__Christensenellaceae R-7 group	0.0077	0	0.0307	0	0.0038	0	0.0077	0.188	0.0192	0	0	0.0077	0.0537	0.0422	0.3606	0.023
32	p__Firmicutes; c__Clostridia; o__Clostridiales; f__Clostridiaceae 1; g__Clostridium sensu stricto 1	0.1191	0.0576	0.0384	0.0269	0	0	0	0.1074	0.353	0	0	0.0115	0.3761	0.0038	0	0
33	p__Firmicutes; c__Clostridia; o__Clostridiales; f__Family XI; g__Helcococcus	0.3533	0.2573	0	0.4377	0	0.2924	0	0	0	0	0	0	0	0	0	0
34	p__Firmicutes; c__Clostridia; o__Clostridiales; f__Family XI; g__Murdochiella	0.507	0.1037	0	0.0845	0	0	0	0	0	0	0	0	0	0	0	0
35	p__Firmicutes; c__Clostridia; o__Clostridiales; f__Family XI; g__Peptoniphilus	1.398	0.4108	0	0.1574	0	0.1462	0	0	0	0	0	0	0	0	0	0
36	p__Firmicutes; c__Clostridia; o__Clostridiales; f__Lachnospiraceae; g__[Eubacterium] eligens group	0	0	0	0	0	0	0.0077	1.9066	0.0767	0.0576	0.0845	0	0.0307	0.3186	1.1432	0.0115
37	p__Firmicutes; c__Clostridia; o__Clostridiales; f__Lachnospiraceae; g__[Eubacterium] hallii group	0	0	0.2803	0	0.0115	0	0.0345	1.8184	2.5743	0.0307	0.0346	0.0922	1.3086	0.0154	0.5141	0.0461
38	p__Firmicutes; c__Clostridia; o__Clostridiales; f__Lachnospiraceae; g__[Eubacterium] ruminantium group	0	0	0.0077	0	0	0	0	0.491	0	0.0115	0.0115	0.0038	0.0959	0.0422	0.2647	0
39	p__Firmicutes; c__Clostridia; o__Clostridiales; f__Lachnospiraceae; g__[Ruminococcus] gauvreauii group	0	0	0.1113	0	0.0115	0	0.0192	0.0077	0.0038	0	0.0422	0	0.3108	0.1804	0.468	0.2341
40	p__Firmicutes; c__Clostridia; o__Clostridiales; f__Lachnospiraceae; g__[Ruminococcus] gnavus group	0	0	0.023	0.0115	0.0077	0	0.0154	0	0.0038	0	0.0192	0	0.3377	0	0.4335	0
41	p__Firmicutes; c__Clostridia; o__Clostridiales; f__Lachnospiraceae; g__[Ruminococcus] torques group	0.0422	0.0077	0.6297	0.1267	0.0461	0.0192	0.0537	3.1342	6.0771	0.1114	0.0998	0.0192	2.763	0.4721	2.0486	0.6142
42	p__Firmicutes; c__Clostridia; o__Clostridiales; f__Lachnospiraceae; g__Agathobacter	0	0	0.4147	0.0038	0.0423	0	0.0537	4.5537	3.0692	0.0576	0.0614	0.242	2.9817	0.0614	4.0434	0.0384
43	p__Firmicutes; c__Clostridia; o__Clostridiales; f__Lachnospiraceae; g__Anaerostipes	0	0.0038	0.1613	0	0.0154	0	0	1.1777	0.399	0.0269	0.0384	0.0576	0.5718	0.0384	0.6867	0.023
44	p__Firmicutes; c__Clostridia; o__Clostridiales; f__Lachnospiraceae; g__Blautia	0.0615	0.0346	1.0175	0.096	0.0884	0.2193	0.2226	6.5639	11.0877	0.0807	0.43	0.3342	2.8052	1.3319	5.39	1.4126
45	p__Firmicutes; c__Clostridia; o__Clostridiales; f__Lachnospiraceae; g__CAG-56	0	0	0.0614	0	0	0	0.0077	0.1266	0	0	0.0115	0.0115	0	0	0.5179	0
46	p__Firmicutes; c__Clostridia; o__Clostridiales; f__Lachnospiraceae; g__Coprococcus 1	0	0	0.023	0	0	0	0	0.3491	0.0767	0.0077	0.023	0	0.119	0	0.2033	0
47	p__Firmicutes; c__Clostridia; o__Clostridiales; f__Lachnospiraceae; g__Coprococcus 2	0	0	0	0	0	0	0.0038	2.2903	0.0115	0.0807	0.0038	0.0077	0	0.522	1.3964	0.0115
48	p__Firmicutes; c__Clostridia; o__Clostridiales; f__Lachnospiraceae; g__Dorea	0	0.0192	0.549	0	0.0384	0	0.0461	3.115	1.972	0	0.2495	0.0576	2.1758	0.7024	2.3248	0.737
49	p__Firmicutes; c__Clostridia; o__Clostridiales; f__Lachnospiraceae; g__Fusicatenibacter	0	0	0.3878	0	0.0231	0	0.0384	1.358	2.1408	0.0154	0.1958	0.0461	0.4758	0.0269	1.5882	0.0192
50	p__Firmicutes; c__Clostridia; o__Clostridiales; f__Lachnospiraceae; g__Lachnoclostridium	0	0	0.1497	0	0.0038	0	0.0192	0.7826	3.0539	0.0615	0.0307	0.0269	0.3799	0.0192	1.1777	0.0154
51	p__Firmicutes; c__Clostridia; o__Clostridiales; f__Lachnospiraceae; g__Lachnospira	0	0	0	0	0	0	0	0.3529	0.257	0.0154	0	0.0115	0.0077	0.0345	0.2839	0.0729
52	p__Firmicutes; c__Clostridia; o__Clostridiales; f__Lachnospiraceae; g__Pseudobutyrivibrio	0	0	0.0883	0	0	0	0.0077	0	0	0.0077	0.0154	0	0.5488	0	0	0
53	p__Firmicutes; c__Clostridia; o__Clostridiales; f__Lachnospiraceae; g__Roseburia	0	0	0.192	0	0.0423	0.0577	0.0192	1.968	0.7673	0.0576	0.0499	0.1037	0.7368	0.5412	2.6662	0.4146
54	p__Firmicutes; c__Clostridia; o__Clostridiales; f__Peptostreptococcaceae; g__Clostridioides	0.0615	0	0.1267	0.0077	0.0115	0	0.0154	0.3299	0.1688	0	0.0307	0	0.023	0.0192	0.0806	0
55	p__Firmicutes; c__Clostridia; o__Clostridiales; f__Peptostreptococcaceae; g__Peptostreptococcus	0.7528	0.2189	0	0.119	0	0.0885	0	0	0	0	0	0	0	0	0	0
56	p__Firmicutes; c__Clostridia; o__Clostridiales; f__Peptostreptococcaceae; g__Romboutsia	0.1767	0.0845	0.1152	0.0883	0.0192	0.1808	0	0.1765	0.2839	0	0	0.0307	0.3646	0.0115	0	0.0038
57	p__Firmicutes; c__Clostridia; o__Clostridiales; f__Ruminococcaceae; g__[Eubacterium] coprostanoligenes group	0.1037	0.0077	0.0192	0	0.0115	0	0.023	0.7404	0.6522	0.0154	0.023	0.0576	0.5449	0.1151	1.2238	0.142
58	p__Firmicutes; c__Clostridia; o__Clostridiales; f__Ruminococcaceae; g__Butyricicoccus	0	0	0.1613	0.0077	0.0038	0	0.1151	2.4782	0.4489	0.0115	0.0768	0.0192	0.8903	0.499	2.1867	0.0806
59	p__Firmicutes; c__Clostridia; o__Clostridiales; f__Ruminococcaceae; g__Faecalibacterium	0	0.0038	1.6625	0.0346	0.2151	0.0038	0.284	13.0893	6.5528	0.3957	0.787	0.7835	10.2191	3.8806	15.3144	1.3703
60	p__Firmicutes; c__Clostridia; o__Clostridiales; f__Ruminococcaceae; g__Ruminococcaceae UCG-002	0	0	0.0461	0	0	0.0231	0	1.2775	0.3837	0	0.0461	0.023	0.4682	0.1996	1.4002	0.096
61	p__Firmicutes; c__Clostridia; o__Clostridiales; f__Ruminococcaceae; g__Ruminococcaceae UCG-013	0	0	0.0038	0	0	0	0.0115	0.2148	0.0384	0.0115	0.0038	0.0192	0.0499	0	0.3376	0.0038
62	p__Firmicutes; c__Clostridia; o__Clostridiales; f__Ruminococcaceae; g__Ruminococcus 1	0	0	0.0346	0	0.0115	0	0.0115	0.6637	0.3184	0.0115	0.0077	0.023	0.2111	0.1305	0.1496	0.0883
63	p__Firmicutes; c__Clostridia; o__Clostridiales; f__Ruminococcaceae; g__Ruminococcus 2	0	0.0038	0.1113	0	0.0231	0	0.0115	0.3338	1.0589	0.0154	0.0461	0.0154	0.3185	0.2188	0.0806	0.0499
64	p__Firmicutes; c__Clostridia; o__Clostridiales; f__Ruminococcaceae; g__Subdoligranulum	0	0	0.096	0.0307	0.0115	0.0038	0.0422	2.835	1.7725	0.0499	0.0653	0	0.5756	0.499	2.7506	0.1842
65	p__Firmicutes; c__Erysipelotrichia; o__Erysipelotrichales; f__Erysipelotrichaceae; g__Catenibacterium	0	0.0038	0.5145	0	0.0077	0	0.0499	4.381	2.018	0.0768	0.1804	0.192	3.8566	0.4606	0.8286	0.3992
66	p__Firmicutes; c__Erysipelotrichia; o__Erysipelotrichales; f__Erysipelotrichaceae; g__Erysipelotrichaceae UCG-003	0	0	0.215	0.0077	0.0154	0	0.0115	0.9936	0.8172	0.0038	0.0384	0.0576	0.8558	0.1919	0.4105	0.1958
67	p__Firmicutes; c__Erysipelotrichia; o__Erysipelotrichales; f__Erysipelotrichaceae; g__Holdemanella	0	0	0.3225	0	0.0231	0	0.0115	2.2327	2.582	0.0154	0.1459	0.1267	1.3469	0.4951	2.0371	0.4107
68	p__Firmicutes; c__Negativicutes; o__Selenomonadales; f__Acidaminococcaceae; g__Phascolarctobacterium	0	0	0.1421	0	0.0077	0	0.0307	0.4028	0.6829	0.0231	0.0269	0.0576	1.2932	0.1535	0.3606	0.3762
69	p__Firmicutes; c__Negativicutes; o__Selenomonadales; f__Veillonellaceae; g__Dialister	0	0	0.1574	0	0.0038	0	0.1228	3.725	0.7328	0.0884	0.1766	0.0538	1.9686	0.6487	3.5447	0.1881
70	p__Firmicutes; c__Negativicutes; o__Selenomonadales; f__Veillonellaceae; g__Megamonas	0	0	0.0614	0	0	0	0.0077	0.0115	0.4297	0	0	0.0461	0.3454	0.0038	0.1343	0.096
71	p__Fusobacteria; c__Fusobacteriia; o__Fusobacteriales; f__Fusobacteriaceae; g__Fusobacterium	4.5051	1.7394	0.1075	1.3707	0	0.8848	0	0.046	0.5448	0	0	0.0422	0.2533	0.0115	0	0.0921
72	p__Fusobacteria; c__Fusobacteriia; o__Fusobacteriales; f__Leptotrichiaceae; g__Caviibacter	2.0394	0.5184	0	0.1843	0	0.3308	0	0	0	0	0	0	0	0	0	0
73	p__Proteobacteria; c__Alphaproteobacteria; o__Caulobacterales; f__Caulobacteraceae; g__Brevundimonas	1.6745	1.102	0	0.5836	0	2.0773	0	0.5601	0.3683	0	0.0154	0.023	0.0767	0	0.0806	0.0038
74	p__Proteobacteria; c__Alphaproteobacteria; o__Caulobacterales; f__Caulobacteraceae; g__Phenylobacterium	0	0	1.0328	0	0.1767	0.0038	0.8175	1.0972	0.5218	0.0038	1.6392	0	30.5729	1.9192	0	0.1842
75	p__Proteobacteria; c__Alphaproteobacteria; o__Caulobacterales; f__Caulobacteraceae; g__taxa	0	0	0.1651	0	0.0077	0	0.0921	3.5294	14.107	0.0192	0.2419	0.1959	3.6763	0.2802	20.5394	0.023
76	p__Proteobacteria; c__Alphaproteobacteria; o__Caulobacterales; f__Caulobacteraceae; g__uncultured	0.0269	0.0192	0.0115	0	0.0077	0	0.023	2.0831	2.5475	0	0.0115	0.0499	0.6485	0.5297	0.046	0.0461
77	p__Proteobacteria; c__Alphaproteobacteria; o__Rhizobiales; f__Beijerinckiaceae; g__Bosea	0.0192	0.1267	0.0115	0.1152	0	0.8425	0	0.0767	0.2302	0	0.0077	0.0038	0	0	0.0499	0
78	p__Proteobacteria; c__Alphaproteobacteria; o__Rhizobiales; f__Beijerinckiaceae; g__Methylobacterium	0	0	0	0.0499	0	4.7355	0	0	0	0	0	0	0	0	0	0
79	p__Proteobacteria; c__Alphaproteobacteria; o__Rhizobiales; f__Xanthobacteraceae; g__Afipia	0.096	0.023	0	0.0154	0	0.3885	0.0077	0	0.1343	0	0.0077	0	0.1036	0	0	0
80	p__Proteobacteria; c__Alphaproteobacteria; o__Rhizobiales; f__Xanthobacteraceae; g__Bradyrhizobium	0.2381	0.3417	0.0346	0.2803	0.0038	1.3887	0.0461	0.234	0.2494	0.0154	0.0691	0.0154	0.5718	0.0115	0.4105	0
81	p__Proteobacteria; c__Alphaproteobacteria; o__Rhizobiales; f__Xanthobacteraceae; g__Rhodoplanes	0.9256	0.0384	0	0.2073	0	0.7501	0	0	0	0	0	0	0	0	0	0
82	p__Proteobacteria; c__Alphaproteobacteria; o__Rhizobiales; f__Xanthobacteraceae; g__taxa	0.3341	0.2227	0	0.0499	0	1.1387	0	0.0153	0	0	0	0	0	0	0	0
83	p__Proteobacteria; c__Alphaproteobacteria; o__Rhizobiales; f__Xanthobacteraceae; g__uncultured	0.3725	0.2611	0	0.3455	0	1.0617	0.0115	0.0115	0	0	0	0	0	0	0	0
84	p__Proteobacteria; c__Alphaproteobacteria; o__Rhodobacterales; f__Rhodobacteraceae; g__Amaricoccus	0.1267	0.096	0	0.1344	0	0.0577	0	0.0844	0.0614	0.0038	0.0077	0.0038	0.0192	0	0	0
85	p__Proteobacteria; c__Alphaproteobacteria; o__Rhodobacterales; f__Rhodobacteraceae; g__Gemmobacter	0.9371	0.4646	0	0.5529	0	0.9887	0	0.0077	0.0614	0	0	0	0	0	0	0
86	p__Proteobacteria; c__Alphaproteobacteria; o__Rhodobacterales; f__Rhodobacteraceae; g__Paracoccus	1.6976	0.4569	0.0115	0.2956	0	1.7696	0	0.2187	2.8582	0	0.0346	0	0.0115	0	1.7647	0.0038
87	p__Proteobacteria; c__Alphaproteobacteria; o__Rickettsiales; f__Mitochondria; g__Tectona grandis	0.9563	0.3341	0.0077	0.1037	0.0038	1.1502	0.023	0.1343	0.2724	0.0077	0.0461	0.0038	0.6716	0.0691	0.3299	0.0154
88	p__Proteobacteria; c__Alphaproteobacteria; o__Sphingomonadales; f__Sphingomonadaceae; g__Sphingomonas	0.0807	0.0346	0.0883	0.0614	0.0192	6.2204	0.0461	0.4565	1.6305	0.0653	0.1113	0.0115	2.1106	0.165	2.5051	0.0384
89	p__Proteobacteria; c__Alphaproteobacteria; o__uncultured; f__uncultured bacterium; g__uncultured bacterium	0.4225	0.3149	0	0.0038	0	0.7809	0	0	0	0	0	0	0	0	0	0
90	p__Proteobacteria; c__Gammaproteobacteria; o__Beggiatoales; f__Beggiatoaceae; g__uncultured	0.3265	0.2189	0	0.1421	0	0.3116	0	0	0	0	0	0	0	0	0	0
91	p__Proteobacteria; c__Gammaproteobacteria; o__Betaproteobacteriales; f__Burkholderiaceae; g__Aquabacterium	0.2228	0.1037	0	0.023	0	0.0462	0	0.0652	0	0	0	0	0.2801	0	0	0
92	p__Proteobacteria; c__Gammaproteobacteria; o__Betaproteobacteriales; f__Burkholderiaceae; g__Burkholderia-Caballeronia-Paraburkholderia	5.7956	1.6242	0	1.4129	0	7.3745	0	0.0038	0	0	0	0	0	0	0	0
93	p__Proteobacteria; c__Gammaproteobacteria; o__Betaproteobacteriales; f__Burkholderiaceae; g__Comamonas	0.192	0.0806	0	0.3071	0	0.7155	0	0.4949	0	0.0038	0.0845	0	0.2034	0.023	0.0077	0.0038
94	p__Proteobacteria; c__Gammaproteobacteria; o__Betaproteobacteriales; f__Burkholderiaceae; g__Paucibacter	0.0115	0.0115	0	0.0038	0	0.8809	0	0	0	0	0	0	0	0	0	0
95	p__Proteobacteria; c__Gammaproteobacteria; o__Betaproteobacteriales; f__Burkholderiaceae; g__Ralstonia	8.776	3.2983	0.0038	2.964	0	13.7873	0	0.0537	0.0729	0.0038	0.0038	0	0.0422	0.0345	0.0077	0.0038
96	p__Proteobacteria; c__Gammaproteobacteria; o__Betaproteobacteriales; f__Burkholderiaceae; g__Schlegelella	0.6606	0.4032	0	0.2496	0	0.6694	0	0.0575	0.0537	0	0.0115	0	0.284	0	0.0729	0
97	p__Proteobacteria; c__Gammaproteobacteria; o__Betaproteobacteriales; f__Burkholderiaceae; g__Tepidimonas	0.2112	0.2073	0	0.0883	0	0.3924	0	0.0115	0.0115	0	0	0	0	0	0	0
98	p__Proteobacteria; c__Gammaproteobacteria; o__Betaproteobacteriales; f__Burkholderiaceae; g__uncultured	0.7873	0.0038	0	0.0422	0	0.0308	0	0	0	0	0	0	0	0	0	0
99	p__Proteobacteria; c__Gammaproteobacteria; o__Betaproteobacteriales; f__Hydrogenophilaceae; g__Hydrogenophilus	0.4916	0.3993	0	0.1958	0	1.4041	0	0	0	0	0.0077	0	0.0038	0	0.0499	0
100	p__Proteobacteria; c__Gammaproteobacteria; o__Enterobacteriales; f__Enterobacteriaceae; g__Enterobacter	0	0	0.0077	0	0.0038	0	0	0.0115	0.0115	5.1558	0.023	0	0.6102	0.0499	0	0.0499
101	p__Proteobacteria; c__Gammaproteobacteria; o__Enterobacteriales; f__Enterobacteriaceae; g__Escherichia-Shigella	0	0.0307	0.2956	0.0115	0.0269	0.0038	0.0192	1.1892	1.5346	0	0.023	0.0691	3.1736	0.1267	0.6944	0.2457
102	p__Proteobacteria; c__Gammaproteobacteria; o__Enterobacteriales; f__Enterobacteriaceae; g__Gibbsiella	0	0	1.5704	0	1.5367	0	1.7924	0	0	0	1.5778	0.0077	0.0153	0.0115	0	0.1612
103	p__Proteobacteria; c__Gammaproteobacteria; o__Enterobacteriales; f__Enterobacteriaceae; g__Klebsiella	0.0077	0.0038	0.0422	0.0269	0.0077	0	0	0.4719	0.0537	92.2625	0	0.0115	1.558	0.3109	0	0.284
104	p__Proteobacteria; c__Gammaproteobacteria; o__Enterobacteriales; f__Enterobacteriaceae; g__Raoultella	0	0	0	0	0	0	0	0	0.844	0	0	0	0.0038	0	0	0
105	p__Proteobacteria; c__Gammaproteobacteria; o__Enterobacteriales; f__Enterobacteriaceae; g__Serratia	0	0.0038	86.1816	0.023	97.2339	0	94.9182	0.1381	0	0.6032	91.6734	95.245	0.6831	79.8219	0.0652	88.166
106	p__Proteobacteria; c__Gammaproteobacteria; o__Pseudomonadales; f__Moraxellaceae; g__Acinetobacter	8.342	5.7326	0.0077	3.2481	0.0038	12.6601	0.0154	3.4411	6.0848	0.0384	0.1689	0.0845	1.1704	0.2111	0.3261	0.0499
107	p__Proteobacteria; c__Gammaproteobacteria; o__Pseudomonadales; f__Moraxellaceae; g__Perlucidibaca	0.1959	0.0192	0.0192	0.0038	0.0038	0	0	0.6061	0.0307	0	0	0.0077	0.0269	0.023	0.0882	0.023
108	p__Proteobacteria; c__Gammaproteobacteria; o__Pseudomonadales; f__Pseudomonadaceae; g__Pseudomonas	0.0115	0.0154	0	0.0077	0	0	0	1.8069	0	0	0	0	1.4582	0	0	0
109	p__Proteobacteria; c__Gammaproteobacteria; o__Xanthomonadales; f__Xanthomonadaceae; g__Pseudoxanthomonas	0.3111	0.1037	0	0	0	0.6001	0	0.0038	0.2762	0	0	0	0	0	0	0
110	p__Proteobacteria; c__Gammaproteobacteria; o__Xanthomonadales; f__Xanthomonadaceae; g__Stenotrophomonas	0.4071	0.1037	0	0.0269	0	0.2231	0	0	0	0	0	0	0	0	0.1381	0
111	p__Proteobacteria; c__Gammaproteobacteria; o__Xanthomonadales; f__Xanthomonadaceae; g__Thermomonas	0.1575	0	0.0077	0	0	0	0	0.2072	0.3299	0.0038	0	0.0038	0	0.0077	0	0
112	p__Proteobacteria; c__Gammaproteobacteria; o__Xanthomonadales; f__Xanthomonadaceae; g__Xanthomonas	0	22.654	0	0.238	0	0.0115	0	0	0	0	0	0	0	0	0	0

## Sheet: Species
N	taxonomy	YYF1	YYM1	YJM2	YYF2	YJM3	YYM3	YJF5	YYM14	YYF15	YJM17	YJF28	YJF30	YYF30	YJM31	YYM31	YJF36
1	p__Actinobacteria; c__Actinobacteria; o__Actinomycetales; f__Actinomycetaceae; g__Trueperella; s__Trueperella pyogenes	1.7744	0.5222	0	0.8139	0	0.5193	0	0	0	0	0	0	0	0	0	0
2	p__Actinobacteria; c__Actinobacteria; o__Bifidobacteriales; f__Bifidobacteriaceae; g__Bifidobacterium; s__taxa	0.0422	0.0077	0.4915	0.0422	0.0922	0.0769	0.0614	2.5089	2.8122	0.0461	0.1958	0.0461	0.9325	0.403	1.7915	0.1804
3	p__Actinobacteria; c__Actinobacteria; o__Corynebacteriales; f__Corynebacteriaceae; g__Corynebacterium 1; s__taxa	1.2098	0.4953	0	0.288	0	0.904	0	0.702	1.0857	0	0	0.023	0.0115	0.023	0.2532	0.0154
4	p__Actinobacteria; c__Actinobacteria; o__Corynebacteriales; f__Nocardiaceae; g__Rhodococcus; s__taxa	1.3903	0.3187	0	0.2918	0	0.0462	0	0.1074	0.1343	0.0038	0.0077	0.0038	0.0767	0	0	0.0115
5	p__Actinobacteria; c__Actinobacteria; o__Corynebacteriales; f__Nocardiaceae; g__Rhodococcus; s__uncultured Rhodococcus sp.	0	0	0	0	0	1.0002	0	0	0.0038	0	0	0	0	0	0	0
6	p__Actinobacteria; c__Actinobacteria; o__Frankiales; f__Acidothermaceae; g__Acidothermus; s__taxa	0.2036	0.0922	0	0.0538	0	0.5116	0	0	0	0	0	0	0	0	0	0
7	p__Actinobacteria; c__Actinobacteria; o__Micrococcales; f__Microbacteriaceae; g__Leucobacter; s__taxa	0.0115	0	0	0	0	0.0192	0	0.2033	0.4259	0	0	0.0038	0	0	0.046	0
8	p__Actinobacteria; c__Coriobacteriia; o__Coriobacteriales; f__Coriobacteriaceae; g__Collinsella; s__Collinsella aerofaciens	0	0	0	0	0	0.0885	0	0.1573	0.3875	0	0	0.0346	0.0077	0.1535	0.5831	0.5719
9	p__Actinobacteria; c__Coriobacteriia; o__Coriobacteriales; f__Coriobacteriaceae; g__Collinsella; s__uncultured bacterium	0.1075	0.0154	0.5721	0	0.073	0.0077	0.0154	0.9629	2.3748	0	0.0845	0.169	1.3661	0.0461	0.0806	0.1612
10	p__Actinobacteria; c__Coriobacteriia; o__Coriobacteriales; f__Eggerthellaceae; g__Senegalimassilia; s__unidentified	0	0	0.0384	0	0.0038	0	0.0038	0.28	0.257	0	0.0115	0.023	0.1228	0.0115	0.8095	0.0921
11	p__Bacteroidetes; c__Bacteroidia; o__Bacteroidales; f__Bacteroidaceae; g__Bacteroides; s__Bacteroides vulgatus PC510	0	0	0.073	0	0.0115	0	0.023	0.5563	0.7903	0.0307	0.0422	0.0538	0.4336	0.1151	0.0038	0.0883
12	p__Bacteroidetes; c__Bacteroidia; o__Bacteroidales; f__Bacteroidaceae; g__Bacteroides; s__human gut metagenome	0	0	0.0768	0	0.0115	0	0	0.1841	0.6944	0.0038	0	0.023	0.5027	0.0115	0.1036	0.0422
13	p__Bacteroidetes; c__Bacteroidia; o__Bacteroidales; f__Bacteroidaceae; g__Bacteroides; s__taxa	3.8906	0.5568	0	0.3379	0	0.6617	0	0	0	0	0	0	0	0	0	0
14	p__Bacteroidetes; c__Bacteroidia; o__Bacteroidales; f__Bacteroidaceae; g__Bacteroides; s__uncultured bacterium	0	0	0.0307	0	0	0	0.0154	0.2225	0.0115	0.0115	0.0307	0.0077	0.2379	0.0653	0.0192	0
15	p__Bacteroidetes; c__Bacteroidia; o__Bacteroidales; f__Porphyromonadaceae; g__Porphyromonas; s__taxa	0.8334	0.1805	0	0.2265	0	0.0462	0	0	0	0	0	0	0	0	0	0
16	p__Bacteroidetes; c__Bacteroidia; o__Bacteroidales; f__Prevotellaceae; g__Alloprevotella; s__Prevotellamassilia timonensis	0	0	0.2419	0.0038	0.0115	0	0.0192	0.3453	1.5807	0.0231	0.0422	0.1959	1.3201	0.3263	0.0345	0.3608
17	p__Bacteroidetes; c__Bacteroidia; o__Bacteroidales; f__Prevotellaceae; g__Alloprevotella; s__uncultured bacterium	0	0	0.0038	0	0	0	0.0192	1.055	0.1151	0.0423	0.0998	0.0077	0	0.4261	0.8171	0
18	p__Bacteroidetes; c__Bacteroidia; o__Bacteroidales; f__Prevotellaceae; g__Prevotella 2; s__uncultured bacterium	0	0	0.0461	0	0	0	0.0652	3.092	0.0882	0.0615	0.0307	0.0384	0.1765	0.3416	0.6713	0.0844
19	p__Bacteroidetes; c__Bacteroidia; o__Bacteroidales; f__Prevotellaceae; g__Prevotella 9; s__taxa	0	0	0.1421	0	0.0154	0	0.0307	0.0921	0.8786	0	0.0077	0.1613	1.393	0.023	0.1956	0.1535
20	p__Bacteroidetes; c__Bacteroidia; o__Bacteroidales; f__Prevotellaceae; g__Prevotella 9; s__uncultured bacterium	0	0	0.5107	0	0.0231	0	0.0691	2.1291	3.2189	0.096	0.0499	0.6491	3.4268	0.7254	0.2378	0.7639
21	p__Bacteroidetes; c__Bacteroidia; o__Bacteroidales; f__Prevotellaceae; g__Prevotella 9; s__uncultured Wautersiella sp.	0	0	0.0461	0	0.0038	0	0	0.1266	0.2264	0	0	0.0461	0.6639	0.0269	0.023	0.0768
22	p__Bacteroidetes; c__Bacteroidia; o__Chitinophagales; f__Chitinophagaceae; g__Hydrotalea; s__taxa	0.2535	0.0806	0	0.0883	0	0.8386	0	0	0	0	0	0	0	0	0	0
23	p__Bacteroidetes; c__Bacteroidia; o__Cytophagales; f__Hymenobacteraceae; g__Hymenobacter; s__taxa	0	0	0	0	0	2.085	0	0	0	0	0	0	0	0	0	0
24	p__Bacteroidetes; c__Bacteroidia; o__Flavobacteriales; f__Weeksellaceae; g__Chryseobacterium; s__taxa	0.5262	0.0077	0	0.2304	0	0.0269	0.0038	0.0077	0.0115	0	0	0	0	0.0192	0	0.0038
25	p__Chloroflexi; c__KD4-96; o__uncultured bacterium; f__uncultured bacterium; g__uncultured bacterium; s__uncultured bacterium	0.6491	0.1305	0	0.0883	0	0.3924	0	0	0	0	0	0	0	0	0	0
26	p__Chloroflexi; c__Ktedonobacteria; o__Ktedonobacterales; f__JG30-KF-AS9; g__uncultured bacterium; s__uncultured bacterium	0.0038	0.0614	0	0.0077	0	0.7271	0	0	0	0	0	0	0	0	0	0
27	p__Cyanobacteria; c__Oxyphotobacteria; o__Chloroplast; f__Allium ampeloprasum (leek); g__Allium ampeloprasum (leek); s__Allium ampeloprasum (leek)	0.2228	0	0.0768	0.0077	0	0	0.2687	0	0	0	0.0998	0	0	0	0	0
28	p__Cyanobacteria; c__Oxyphotobacteria; o__Chloroplast; f__Elodea nuttallii; g__Elodea nuttallii; s__Elodea nuttallii	0	0.4915	0	0	0	0	0	0	0	0	0	0	0	0	0	0
29	p__Cyanobacteria; c__Oxyphotobacteria; o__Chloroplast; f__Pinus sylvestris (Scots pine); g__Pinus sylvestris (Scots pine); s__Pinus sylvestris (Scots pine)	8.4149	0	0.0115	0.0422	0	0	0.0192	0	0	0	0.0077	0.1229	0	0	0.0537	0.0077
30	p__Cyanobacteria; c__Oxyphotobacteria; o__Chloroplast; f__taxa; g__taxa; s__taxa	0.6952	0	0	0	0	0	0.0192	0.0115	0	0	0	0	0	0	1.9258	0
31	p__Deinococcus-Thermus; c__Deinococci; o__Deinococcales; f__Deinococcaceae; g__Deinococcus; s__taxa	0	0	0	0	0	13.8604	0	0	0	0	0	0	0	0	0	0
32	p__Firmicutes; c__Bacilli; o__Bacillales; f__Bacillaceae; g__Bacillus; s__Bacillus cereus	0.1882	0.0154	0	0.0115	0	0	0.0345	0	0	0	0	0.0077	0	0.0844	0	0.5834
33	p__Firmicutes; c__Bacilli; o__Bacillales; f__Family XII; g__Exiguobacterium; s__Exiguobacterium profundum	0	0	0	0.0691	0	0.1039	0	0.0729	0	0	0	0	0.4336	0	0	0
34	p__Firmicutes; c__Bacilli; o__Bacillales; f__Staphylococcaceae; g__Staphylococcus; s__Staphylococcus caprae	0.434	0.1881	0	0.0576	0	0	0	0.0537	0	0	0	0	0	0	0.0575	0.0038
35	p__Firmicutes; c__Bacilli; o__Lactobacillales; f__Enterococcaceae; g__Enterococcus; s__taxa	0.0077	0.0077	0.0038	0.0115	0	0	0	0.1036	0	0	0.023	0	0.2494	0	0.3299	0
36	p__Firmicutes; c__Bacilli; o__Lactobacillales; f__Lactobacillaceae; g__Lactobacillus; s__Lactobacillus brevis	0.0538	0.4224	0	0.7256	0	0	0	0.0115	0	0	0	0	0.0499	0	0.165	0
37	p__Firmicutes; c__Bacilli; o__Lactobacillales; f__Lactobacillaceae; g__Lactobacillus; s__Lactobacillus pentosus	2.0893	9.8257	0	14.125	0	0.804	0	0.0153	0	0	0	0	0	0.0115	0.2494	0
38	p__Firmicutes; c__Bacilli; o__Lactobacillales; f__Lactobacillaceae; g__Lactobacillus; s__Lactobacillus reuteri	0.0077	0.0307	0	0	0	0	0.0154	0.1151	0.0307	0	0	0.0077	0.2648	0.023	0.1726	0
39	p__Firmicutes; c__Bacilli; o__Lactobacillales; f__Lactobacillaceae; g__Lactobacillus; s__taxa	0.0768	0.0154	0.0038	0.0346	0	0.1116	0.096	2.5703	0.0038	0.1191	0.3148	0.0115	0.188	1.0172	4.5767	0.0192
40	p__Firmicutes; c__Bacilli; o__Lactobacillales; f__Lactobacillaceae; g__Lactobacillus; s__uncultured bacterium	0.0691	0.1536	0	0.0845	0	0.2808	0.0269	0.3721	0.587	0.0038	0.0154	0.0346	0.2341	0.0691	0.2494	0.0077
41	p__Firmicutes; c__Bacilli; o__Lactobacillales; f__Leuconostocaceae; g__Weissella; s__taxa	30.6717	43.7874	0	67.4729	0	11.6176	0	0.1611	0.1036	0	0	0	0.2686	0	0.0384	0.0077
42	p__Firmicutes; c__Bacilli; o__Lactobacillales; f__Leuconostocaceae; g__Weissella; s__Weissella hellenica	0.0807	0.2035	0	0.215	0	0.0192	0	0.0077	0	0	0	0	0	0	0	0
43	p__Firmicutes; c__Bacilli; o__Lactobacillales; f__Streptococcaceae; g__Streptococcus; s__Streptococcus mutans UA159-FR	0.9256	0	0	0	0	0	0	0	0	0	0	0	0	0	0	0
44	p__Firmicutes; c__Bacilli; o__Lactobacillales; f__Streptococcaceae; g__Streptococcus; s__Streptococcus thermophilus TH1435	0	0	0.023	0.0077	0	0	0.0192	0.3798	0.0537	0	0.0307	0.0077	0	0.1228	0.4642	0.0038
45	p__Firmicutes; c__Bacilli; o__Lactobacillales; f__Streptococcaceae; g__Streptococcus; s__taxa	0.0038	0	0	0	0.0038	0	0.0038	1.0895	0.1803	0.0269	0.0154	0.0038	0	0.1996	1.358	0.0038
46	p__Firmicutes; c__Bacilli; o__Lactobacillales; f__Streptococcaceae; g__Streptococcus; s__uncultured bacterium	0.2189	0.0614	0.0461	0.0538	0.0154	0.5347	0.0537	1.0089	0.1688	0.0038	0.0691	0	0	0.2687	1.1624	0.0038
47	p__Firmicutes; c__Clostridia; o__Clostridiales; f__Christensenellaceae; g__Christensenellaceae R-7 group; s__metagenome	0.0077	0	0.0307	0	0.0038	0	0.0077	0.188	0.0192	0	0	0.0077	0.0537	0.0422	0.3606	0.023
48	p__Firmicutes; c__Clostridia; o__Clostridiales; f__Clostridiaceae 1; g__Clostridium sensu stricto 1; s__uncultured Clostridium sp.	0.1191	0.0576	0.0384	0.0269	0	0	0	0.1074	0.353	0	0	0.0115	0.3761	0.0038	0	0
49	p__Firmicutes; c__Clostridia; o__Clostridiales; f__Family XI; g__Helcococcus; s__taxa	0.3533	0.2573	0	0.4377	0	0.2924	0	0	0	0	0	0	0	0	0	0
50	p__Firmicutes; c__Clostridia; o__Clostridiales; f__Family XI; g__Murdochiella; s__uncultured bacterium	0.507	0.1037	0	0.0845	0	0	0	0	0	0	0	0	0	0	0	0
51	p__Firmicutes; c__Clostridia; o__Clostridiales; f__Family XI; g__Peptoniphilus; s__Peptoniphilus sp. BG3	1.398	0.4108	0	0.1574	0	0.1462	0	0	0	0	0	0	0	0	0	0
52	p__Firmicutes; c__Clostridia; o__Clostridiales; f__Lachnospiraceae; g__[Eubacterium] eligens group; s__[Eubacterium] eligens ATCC 27750	0	0	0	0	0	0	0.0077	1.9066	0.0767	0.0576	0.0845	0	0.0307	0.3186	1.1432	0.0115
53	p__Firmicutes; c__Clostridia; o__Clostridiales; f__Lachnospiraceae; g__[Eubacterium] hallii group; s__metagenome	0	0	0.2803	0	0.0115	0	0.0345	1.8184	2.5743	0.0307	0.0346	0.0922	1.3086	0.0154	0.5141	0.0461
54	p__Firmicutes; c__Clostridia; o__Clostridiales; f__Lachnospiraceae; g__[Eubacterium] ruminantium group; s__gut metagenome	0	0	0.0077	0	0	0	0	0.491	0	0.0115	0.0115	0.0038	0.0959	0.0422	0.2647	0
55	p__Firmicutes; c__Clostridia; o__Clostridiales; f__Lachnospiraceae; g__[Ruminococcus] gauvreauii group; s__uncultured bacterium	0	0	0.1113	0	0.0115	0	0.0192	0.0077	0.0038	0	0.0422	0	0.3108	0.1804	0.468	0.2341
56	p__Firmicutes; c__Clostridia; o__Clostridiales; f__Lachnospiraceae; g__[Ruminococcus] gnavus group; s__001C	0	0	0.023	0.0115	0.0077	0	0.0154	0	0.0038	0	0.0192	0	0.3377	0	0.4335	0
57	p__Firmicutes; c__Clostridia; o__Clostridiales; f__Lachnospiraceae; g__[Ruminococcus] torques group; s__Ruminococcus faecis JCM 15917	0.0384	0	0.0192	0.0038	0	0	0	0.1113	0.2801	0.0038	0	0.0115	0.0192	0.0499	0.0307	0.0729
58	p__Firmicutes; c__Clostridia; o__Clostridiales; f__Lachnospiraceae; g__[Ruminococcus] torques group; s__taxa	0.0038	0.0077	0.6105	0.1229	0.0461	0.0192	0.0537	3.0153	5.7932	0.1076	0.0998	0.0077	2.7438	0.0077	2.0179	0
59	p__Firmicutes; c__Clostridia; o__Clostridiales; f__Lachnospiraceae; g__[Ruminococcus] torques group; s__uncultured organism	0	0	0	0	0	0	0	0.0077	0.0038	0	0	0	0	0.4145	0	0.5412
60	p__Firmicutes; c__Clostridia; o__Clostridiales; f__Lachnospiraceae; g__Agathobacter; s__metagenome	0	0	0.4147	0.0038	0.0423	0	0.0537	4.5537	3.0692	0.0576	0.0614	0.242	2.9817	0.0614	4.0434	0.0384
61	p__Firmicutes; c__Clostridia; o__Clostridiales; f__Lachnospiraceae; g__Anaerostipes; s__metagenome	0	0.0038	0.0691	0	0.0115	0	0	1.1777	0.399	0.0269	0.0307	0.0576	0.0269	0.0384	0.6867	0.023
62	p__Firmicutes; c__Clostridia; o__Clostridiales; f__Lachnospiraceae; g__Anaerostipes; s__uncultured bacterium	0	0	0.0921	0	0.0038	0	0	0	0	0	0.0077	0	0.5449	0	0	0
63	p__Firmicutes; c__Clostridia; o__Clostridiales; f__Lachnospiraceae; g__Blautia; s__metagenome	0	0.0307	0.1536	0	0.0115	0.1154	0.0307	1.0857	1.0627	0	0.0422	0.0461	0.2418	0.0768	0.7097	0.0883
64	p__Firmicutes; c__Clostridia; o__Clostridiales; f__Lachnospiraceae; g__Blautia; s__taxa	0.0077	0.0038	0.0614	0.0077	0.0115	0.1	0.023	1.1777	1.0934	0.0768	0.0269	0.0269	0.0537	0.0806	0.0729	0.0806
65	p__Firmicutes; c__Clostridia; o__Clostridiales; f__Lachnospiraceae; g__Blautia; s__uncultured bacterium	0.0538	0	0.8025	0.0883	0.0653	0.0038	0.1689	4.3005	8.9315	0.0038	0.3609	0.2612	2.5097	1.1745	4.6074	1.2437
66	p__Firmicutes; c__Clostridia; o__Clostridiales; f__Lachnospiraceae; g__CAG-56; s__metagenome	0	0	0.0614	0	0	0	0.0077	0.1266	0	0	0.0115	0.0115	0	0	0.5179	0
67	p__Firmicutes; c__Clostridia; o__Clostridiales; f__Lachnospiraceae; g__Coprococcus 1; s__taxa	0	0	0.023	0	0	0	0	0.3491	0.0767	0.0077	0.023	0	0.119	0	0.2033	0
68	p__Firmicutes; c__Clostridia; o__Clostridiales; f__Lachnospiraceae; g__Coprococcus 2; s__taxa	0	0	0	0	0	0	0.0038	2.2903	0.0115	0.0807	0.0038	0.0077	0	0.522	1.3964	0.0115
69	p__Firmicutes; c__Clostridia; o__Clostridiales; f__Lachnospiraceae; g__Dorea; s__Dorea formicigenerans ATCC 27755	0	0	0.0998	0	0	0	0.0192	0.8939	0.9745	0	0.0806	0.0346	0.6332	0.1075	0.7366	0.1651
70	p__Firmicutes; c__Clostridia; o__Clostridiales; f__Lachnospiraceae; g__Dorea; s__uncultured bacterium	0	0.0192	0.4492	0	0.0384	0	0.0269	2.2212	0.9975	0	0.1689	0.023	1.5427	0.5949	1.5882	0.5719
71	p__Firmicutes; c__Clostridia; o__Clostridiales; f__Lachnospiraceae; g__Fusicatenibacter; s__Fusicatenibacter saccharivorans	0	0	0.3878	0	0.0231	0	0.0384	1.358	2.1408	0.0154	0.1958	0.0461	0.4758	0.0269	1.5882	0.0192
72	p__Firmicutes; c__Clostridia; o__Clostridiales; f__Lachnospiraceae; g__Lachnoclostridium; s__human gut metagenome	0	0	0.1497	0	0.0038	0	0.0115	0.3107	0.4911	0.0269	0.023	0.0038	0.1919	0.0038	0.4182	0.0077
73	p__Firmicutes; c__Clostridia; o__Clostridiales; f__Lachnospiraceae; g__Lachnoclostridium; s__taxa	0	0	0	0	0	0	0.0077	0.4719	0.3875	0.0346	0.0077	0.023	0.188	0.0154	0.7596	0.0077
74	p__Firmicutes; c__Clostridia; o__Clostridiales; f__Lachnospiraceae; g__Lachnoclostridium; s__uncultured bacterium	0	0	0	0	0	0	0	0	2.1753	0	0	0	0	0	0	0
75	p__Firmicutes; c__Clostridia; o__Clostridiales; f__Lachnospiraceae; g__Lachnospira; s__human gut metagenome	0	0	0	0	0	0	0	0.3529	0.257	0.0154	0	0.0115	0.0077	0.0345	0.2839	0.0729
76	p__Firmicutes; c__Clostridia; o__Clostridiales; f__Lachnospiraceae; g__Pseudobutyrivibrio; s__uncultured bacterium	0	0	0.0883	0	0	0	0.0077	0	0	0.0077	0.0154	0	0.5488	0	0	0
77	p__Firmicutes; c__Clostridia; o__Clostridiales; f__Lachnospiraceae; g__Roseburia; s__metagenome	0	0	0.1229	0	0.0115	0	0.0077	0.1841	0.0384	0	0.0192	0.0038	0.2264	0.0115	0.5217	0.0115
78	p__Firmicutes; c__Clostridia; o__Clostridiales; f__Lachnospiraceae; g__Roseburia; s__uncultured bacterium	0	0	0.0691	0	0.0269	0.0577	0.0115	0.9898	0.3913	0.0346	0.0307	0.0499	0.5065	0.0269	1.6227	0.0115
79	p__Firmicutes; c__Clostridia; o__Clostridiales; f__Lachnospiraceae; g__Roseburia; s__uncultured organism	0	0	0	0	0	0	0	0	0	0	0	0	0	0.5028	0	0.3915
80	p__Firmicutes; c__Clostridia; o__Clostridiales; f__Lachnospiraceae; g__Roseburia; s__uncultured rumen bacterium 4C28d-8	0	0	0	0	0.0038	0	0	0.7941	0.3376	0.0231	0	0.0499	0.0038	0	0.5217	0
81	p__Firmicutes; c__Clostridia; o__Clostridiales; f__Peptostreptococcaceae; g__Clostridioides; s__Clostridioides difficile	0.0615	0	0.1267	0.0077	0.0115	0	0.0154	0.3299	0.1688	0	0.0307	0	0.023	0.0192	0.0806	0
82	p__Firmicutes; c__Clostridia; o__Clostridiales; f__Peptostreptococcaceae; g__Peptostreptococcus; s__uncultured bacterium	0.7528	0.2189	0	0.119	0	0.0885	0	0	0	0	0	0	0	0	0	0
83	p__Firmicutes; c__Clostridia; o__Clostridiales; f__Peptostreptococcaceae; g__Romboutsia; s__uncultured bacterium	0.1767	0.0845	0.1152	0.0883	0.0192	0.1808	0	0.1765	0.2839	0	0	0.0307	0.3646	0.0115	0	0.0038
84	p__Firmicutes; c__Clostridia; o__Clostridiales; f__Ruminococcaceae; g__[Eubacterium] coprostanoligenes group; s__metagenome	0.1037	0.0077	0.0077	0	0.0115	0	0.0154	0.1266	0.2877	0.0077	0.023	0	0.0767	0.0499	0.5256	0.0345
85	p__Firmicutes; c__Clostridia; o__Clostridiales; f__Ruminococcaceae; g__[Eubacterium] coprostanoligenes group; s__uncultured bacterium	0	0	0.0115	0	0	0	0.0077	0.6138	0.3645	0.0077	0	0.0576	0.4682	0.0653	0.6982	0.1075
86	p__Firmicutes; c__Clostridia; o__Clostridiales; f__Ruminococcaceae; g__Butyricicoccus; s__uncultured bacterium	0	0	0.1613	0.0077	0.0038	0	0.1151	2.4782	0.4489	0.0115	0.0768	0.0192	0.8903	0.499	2.1867	0.0806
87	p__Firmicutes; c__Clostridia; o__Clostridiales; f__Ruminococcaceae; g__Faecalibacterium; s__human gut metagenome	0	0	0.5337	0	0.1268	0	0.0844	0.0307	0.0729	0.0077	0.2726	0.0077	1.4813	0.023	4.592	0.0115
88	p__Firmicutes; c__Clostridia; o__Clostridiales; f__Ruminococcaceae; g__Faecalibacterium; s__Trichuris trichiura (human whipworm)	0	0	1.0213	0.0346	0.0807	0.0038	0.1842	0.844	2.348	0.3727	0.4683	0.6914	7.2681	3.8498	0.5448	1.3511
89	p__Firmicutes; c__Clostridia; o__Clostridiales; f__Ruminococcaceae; g__Faecalibacterium; s__uncultured bacterium	0	0.0038	0.1075	0	0.0077	0	0.0154	12.2147	4.132	0.0154	0.0461	0.0845	1.4697	0.0077	10.1776	0.0077
90	p__Firmicutes; c__Clostridia; o__Clostridiales; f__Ruminococcaceae; g__Ruminococcaceae UCG-002; s__gut metagenome	0	0	0.0384	0	0	0.0231	0	0.9552	0.3798	0	0.0422	0.0154	0.4528	0.1881	0.9054	0.0921
91	p__Firmicutes; c__Clostridia; o__Clostridiales; f__Ruminococcaceae; g__Ruminococcaceae UCG-002; s__uncultured bacterium	0	0	0.0077	0	0	0	0	0.3222	0.0038	0	0.0038	0.0077	0.0153	0.0115	0.4949	0.0038
92	p__Firmicutes; c__Clostridia; o__Clostridiales; f__Ruminococcaceae; g__Ruminococcaceae UCG-013; s__uncultured Clostridium sp.	0	0	0.0038	0	0	0	0.0115	0.2148	0.0384	0.0115	0.0038	0.0192	0.0499	0	0.3376	0.0038
93	p__Firmicutes; c__Clostridia; o__Clostridiales; f__Ruminococcaceae; g__Ruminococcus 1; s__Ruminococcus sp. UNK.MGS-30	0	0	0.0346	0	0.0115	0	0.0115	0.6637	0.3184	0.0115	0.0077	0.023	0.2111	0.1305	0.1496	0.0883
94	p__Firmicutes; c__Clostridia; o__Clostridiales; f__Ruminococcaceae; g__Ruminococcus 2; s__taxa	0	0.0038	0.0499	0	0.0192	0	0.0115	0.1803	0.5947	0	0.0115	0.0038	0.2763	0.0461	0.0153	0.0269
95	p__Firmicutes; c__Clostridia; o__Clostridiales; f__Ruminococcaceae; g__Ruminococcus 2; s__uncultured bacterium	0	0	0.0614	0	0.0038	0	0	0.1535	0.4642	0.0154	0.0346	0.0115	0.0422	0.1727	0.0652	0.023
96	p__Firmicutes; c__Clostridia; o__Clostridiales; f__Ruminococcaceae; g__Subdoligranulum; s__human gut metagenome	0	0	0.0538	0.0307	0.0038	0	0.023	2.39	0.7865	0.0307	0.0653	0	0.284	0.4299	1.0972	0.1228
97	p__Firmicutes; c__Clostridia; o__Clostridiales; f__Ruminococcaceae; g__Subdoligranulum; s__uncultured bacterium	0	0	0	0	0	0	0	0.0038	0	0	0	0	0.0038	0	1.0857	0
98	p__Firmicutes; c__Clostridia; o__Clostridiales; f__Ruminococcaceae; g__Subdoligranulum; s__uncultured Ruminococcaceae bacterium	0	0	0.0422	0	0.0077	0.0038	0.0192	0.4412	0.986	0.0192	0	0	0.2878	0.0691	0.5678	0.0614
99	p__Firmicutes; c__Erysipelotrichia; o__Erysipelotrichales; f__Erysipelotrichaceae; g__Catenibacterium; s__metagenome	0	0	0.1152	0	0.0077	0	0.0422	0.1266	0.0115	0	0.1267	0	0.8711	0.0192	0.0115	0.0077
100	p__Firmicutes; c__Erysipelotrichia; o__Erysipelotrichales; f__Erysipelotrichaceae; g__Catenibacterium; s__uncultured bacterium	0	0.0038	0.3993	0	0	0	0.0077	4.2544	2.0065	0.0768	0.0537	0.192	2.9855	0.4414	0.8171	0.3915
101	p__Firmicutes; c__Erysipelotrichia; o__Erysipelotrichales; f__Erysipelotrichaceae; g__Erysipelotrichaceae UCG-003; s__bacterium LF-3	0	0	0.215	0.0077	0.0154	0	0.0115	0.9936	0.8172	0.0038	0.0384	0.0576	0.8558	0.1919	0.4105	0.1958
102	p__Firmicutes; c__Erysipelotrichia; o__Erysipelotrichales; f__Erysipelotrichaceae; g__Holdemanella; s__metagenome	0	0	0.3225	0	0.0231	0	0.0115	1.1777	2.5552	0.0115	0.142	0.1152	1.2433	0.1881	0.9169	0.3455
103	p__Firmicutes; c__Erysipelotrichia; o__Erysipelotrichales; f__Erysipelotrichaceae; g__Holdemanella; s__uncultured bacterium	0	0	0	0	0	0	0	1.055	0.0269	0.0038	0.0038	0.0115	0.1036	0.3071	1.1202	0.0653
104	p__Firmicutes; c__Negativicutes; o__Selenomonadales; f__Acidaminococcaceae; g__Phascolarctobacterium; s__gut metagenome	0	0	0	0	0	0	0.0154	0.2455	0.1304	0.0231	0.0154	0	0	0.0921	0.2187	0.0115
105	p__Firmicutes; c__Negativicutes; o__Selenomonadales; f__Acidaminococcaceae; g__Phascolarctobacterium; s__uncultured bacterium	0	0	0.1421	0	0.0077	0	0.0154	0.1573	0.5525	0	0.0115	0.0576	1.2932	0.0614	0.1419	0.3647
106	p__Firmicutes; c__Negativicutes; o__Selenomonadales; f__Veillonellaceae; g__Dialister; s__gut metagenome	0	0	0.023	0	0	0	0.1151	3.3069	0.1074	0.0884	0.1689	0.0038	0.0844	0.4261	3.1803	0.0537
107	p__Firmicutes; c__Negativicutes; o__Selenomonadales; f__Veillonellaceae; g__Dialister; s__taxa	0	0	0.1344	0	0.0038	0	0.0077	0.4182	0.6254	0	0.0077	0.0499	1.8842	0.2226	0.3644	0.1343
108	p__Firmicutes; c__Negativicutes; o__Selenomonadales; f__Veillonellaceae; g__Megamonas; s__uncultured bacterium	0	0	0.0614	0	0	0	0.0077	0.0115	0.4297	0	0	0.0461	0.3454	0.0038	0.1343	0.096
109	p__Fusobacteria; c__Fusobacteriia; o__Fusobacteriales; f__Fusobacteriaceae; g__Fusobacterium; s__taxa	4.5051	1.7394	0	1.3707	0	0.8848	0	0	0	0	0	0	0	0	0	0
110	p__Fusobacteria; c__Fusobacteriia; o__Fusobacteriales; f__Fusobacteriaceae; g__Fusobacterium; s__unidentified	0	0	0.1075	0	0	0	0	0.046	0.5448	0	0	0.0422	0.2533	0.0115	0	0.0921
111	p__Fusobacteria; c__Fusobacteriia; o__Fusobacteriales; f__Leptotrichiaceae; g__Caviibacter; s__taxa	2.0394	0.5184	0	0.1843	0	0.3308	0	0	0	0	0	0	0	0	0	0
112	p__Proteobacteria; c__Alphaproteobacteria; o__Caulobacterales; f__Caulobacteraceae; g__Brevundimonas; s__Brevundimonas sp. Tibet-IBa1	0.5147	0.1382	0	0.1497	0	0.5886	0	0.1995	0.2225	0	0.0038	0.0077	0	0	0	0
113	p__Proteobacteria; c__Alphaproteobacteria; o__Caulobacterales; f__Caulobacteraceae; g__Brevundimonas; s__taxa	1.133	0.0154	0	0	0	0.1154	0	0.0153	0.0115	0	0	0	0	0	0	0
114	p__Proteobacteria; c__Alphaproteobacteria; o__Caulobacterales; f__Caulobacteraceae; g__Brevundimonas; s__uncultured bacterium	0.0269	0.9484	0	0.4338	0	1.3733	0	0.3453	0.1343	0	0.0115	0.0154	0.0767	0	0.0806	0.0038
115	p__Proteobacteria; c__Alphaproteobacteria; o__Caulobacterales; f__Caulobacteraceae; g__Phenylobacterium; s__taxa	0	0	1.0328	0	0.1767	0.0038	0.8175	1.0972	0.5218	0.0038	1.6392	0	30.5729	1.9192	0	0.1842
116	p__Proteobacteria; c__Alphaproteobacteria; o__Caulobacterales; f__Caulobacteraceae; g__taxa; s__taxa	0	0	0.1651	0	0.0077	0	0.0921	3.5294	14.107	0.0192	0.2419	0.1959	3.6763	0.2802	20.5394	0.023
117	p__Proteobacteria; c__Alphaproteobacteria; o__Caulobacterales; f__Caulobacteraceae; g__uncultured; s__soil bacterium TWE165	0.0269	0.0192	0.0115	0	0.0077	0	0.023	2.0831	2.5475	0	0.0115	0.0499	0.6485	0.5297	0.046	0.0461
118	p__Proteobacteria; c__Alphaproteobacteria; o__Rhizobiales; f__Beijerinckiaceae; g__Bosea; s__uncultured bacterium	0.0192	0.1267	0.0115	0.1152	0	0.8425	0	0.0767	0.2302	0	0.0077	0.0038	0	0	0.0499	0
119	p__Proteobacteria; c__Alphaproteobacteria; o__Rhizobiales; f__Beijerinckiaceae; g__Methylobacterium; s__taxa	0	0	0	0.0499	0	4.7355	0	0	0	0	0	0	0	0	0	0
120	p__Proteobacteria; c__Alphaproteobacteria; o__Rhizobiales; f__Xanthobacteraceae; g__Afipia; s__taxa	0.096	0.023	0	0.0154	0	0.3885	0.0077	0	0.1343	0	0.0077	0	0.1036	0	0	0
121	p__Proteobacteria; c__Alphaproteobacteria; o__Rhizobiales; f__Xanthobacteraceae; g__Bradyrhizobium; s__taxa	0.2381	0.1651	0.0307	0.2112	0.0038	1.3887	0.0307	0.1573	0.1381	0.0154	0.0614	0.0077	0.4336	0.0115	0.3644	0
122	p__Proteobacteria; c__Alphaproteobacteria; o__Rhizobiales; f__Xanthobacteraceae; g__Bradyrhizobium; s__uncultured bacterium	0	0.1766	0.0038	0.0691	0	0	0.0154	0.0767	0.1113	0	0.0077	0.0077	0.1381	0	0.046	0
123	p__Proteobacteria; c__Alphaproteobacteria; o__Rhizobiales; f__Xanthobacteraceae; g__Rhodoplanes; s__uncultured bacterium	0.9256	0.0384	0	0.2073	0	0.7501	0	0	0	0	0	0	0	0	0	0
124	p__Proteobacteria; c__Alphaproteobacteria; o__Rhizobiales; f__Xanthobacteraceae; g__taxa; s__taxa	0.3341	0.2227	0	0.0499	0	1.1387	0	0.0153	0	0	0	0	0	0	0	0
125	p__Proteobacteria; c__Alphaproteobacteria; o__Rhizobiales; f__Xanthobacteraceae; g__uncultured; s__metagenome	0.2381	0.073	0	0.2918	0	0.6847	0.0115	0.0115	0	0	0	0	0	0	0	0
126	p__Proteobacteria; c__Alphaproteobacteria; o__Rhizobiales; f__Xanthobacteraceae; g__uncultured; s__taxa	0.1344	0.1881	0	0.0538	0	0.377	0	0	0	0	0	0	0	0	0	0
127	p__Proteobacteria; c__Alphaproteobacteria; o__Rhodobacterales; f__Rhodobacteraceae; g__Amaricoccus; s__taxa	0.1267	0.096	0	0.1344	0	0.0577	0	0.0844	0.0614	0.0038	0.0077	0.0038	0.0192	0	0	0
128	p__Proteobacteria; c__Alphaproteobacteria; o__Rhodobacterales; f__Rhodobacteraceae; g__Gemmobacter; s__uncultured bacterium	0.9371	0.4646	0	0.5529	0	0.9887	0	0.0077	0.0614	0	0	0	0	0	0	0
129	p__Proteobacteria; c__Alphaproteobacteria; o__Rhodobacterales; f__Rhodobacteraceae; g__Paracoccus; s__bacterium K14(2011)	1.3097	0.0192	0	0.0038	0	0.0077	0	0	0.8978	0	0.0115	0	0	0	0.0153	0.0038
130	p__Proteobacteria; c__Alphaproteobacteria; o__Rhodobacterales; f__Rhodobacteraceae; g__Paracoccus; s__Paracoccus yeei	0.0115	0.0154	0	0	0	0.0154	0	0.0038	0.0422	0	0	0	0	0	0.9015	0
131	p__Proteobacteria; c__Alphaproteobacteria; o__Rhodobacterales; f__Rhodobacteraceae; g__Paracoccus; s__taxa	0.3687	0.0307	0	0.0346	0	1.7465	0	0.023	0.0998	0	0	0	0	0	0.8095	0
132	p__Proteobacteria; c__Alphaproteobacteria; o__Rhodobacterales; f__Rhodobacteraceae; g__Paracoccus; s__uncultured bacterium	0.0077	0.3916	0.0115	0.2572	0	0	0	0.1918	1.8185	0	0.023	0	0.0115	0	0.0384	0
133	p__Proteobacteria; c__Alphaproteobacteria; o__Rickettsiales; f__Mitochondria; g__Tectona grandis; s__Tectona grandis	0.9563	0.3341	0.0077	0.1037	0.0038	1.1502	0.023	0.1343	0.2724	0.0077	0.0461	0.0038	0.6716	0.0691	0.3299	0.0154
134	p__Proteobacteria; c__Alphaproteobacteria; o__Sphingomonadales; f__Sphingomonadaceae; g__Sphingomonas; s__taxa	0.0807	0.0346	0.0883	0.0614	0.0192	6.2204	0.0461	0.4565	1.6305	0.0653	0.1113	0.0115	2.1106	0.165	2.5051	0.0384
135	p__Proteobacteria; c__Alphaproteobacteria; o__uncultured; f__uncultured bacterium; g__uncultured bacterium; s__uncultured bacterium	0.4225	0.3149	0	0.0038	0	0.7809	0	0	0	0	0	0	0	0	0	0
136	p__Proteobacteria; c__Gammaproteobacteria; o__Beggiatoales; f__Beggiatoaceae; g__uncultured; s__taxa	0.3265	0.2189	0	0.1421	0	0.3116	0	0	0	0	0	0	0	0	0	0
137	p__Proteobacteria; c__Gammaproteobacteria; o__Betaproteobacteriales; f__Burkholderiaceae; g__Aquabacterium; s__taxa	0.2228	0.1037	0	0.023	0	0.0462	0	0.0652	0	0	0	0	0.2801	0	0	0
138	p__Proteobacteria; c__Gammaproteobacteria; o__Betaproteobacteriales; f__Burkholderiaceae; g__Burkholderia-Caballeronia-Paraburkholderia; s__taxa	5.7956	1.6242	0	1.4129	0	7.3745	0	0.0038	0	0	0	0	0	0	0	0
139	p__Proteobacteria; c__Gammaproteobacteria; o__Betaproteobacteriales; f__Burkholderiaceae; g__Comamonas; s__taxa	0.192	0.0806	0	0.3071	0	0.7155	0	0.4949	0	0.0038	0.0845	0	0.2034	0.023	0.0077	0.0038
140	p__Proteobacteria; c__Gammaproteobacteria; o__Betaproteobacteriales; f__Burkholderiaceae; g__Paucibacter; s__uncultured bacterium	0.0115	0.0115	0	0.0038	0	0.8809	0	0	0	0	0	0	0	0	0	0
141	p__Proteobacteria; c__Gammaproteobacteria; o__Betaproteobacteriales; f__Burkholderiaceae; g__Ralstonia; s__taxa	2.9189	1.5167	0.0038	1.4628	0	4.547	0	0.0537	0.0729	0.0038	0.0038	0	0.0422	0.0345	0.0077	0.0038
142	p__Proteobacteria; c__Gammaproteobacteria; o__Betaproteobacteriales; f__Burkholderiaceae; g__Ralstonia; s__uncultured bacterium	5.857	1.7816	0	1.5012	0	9.2402	0	0	0	0	0	0	0	0	0	0
143	p__Proteobacteria; c__Gammaproteobacteria; o__Betaproteobacteriales; f__Burkholderiaceae; g__Schlegelella; s__taxa	0.6606	0.4032	0	0.2496	0	0.6694	0	0.0575	0.0537	0	0.0115	0	0.284	0	0.0729	0
144	p__Proteobacteria; c__Gammaproteobacteria; o__Betaproteobacteriales; f__Burkholderiaceae; g__Tepidimonas; s__taxa	0.2112	0.2073	0	0.0883	0	0.3924	0	0.0115	0.0115	0	0	0	0	0	0	0
145	p__Proteobacteria; c__Gammaproteobacteria; o__Betaproteobacteriales; f__Burkholderiaceae; g__uncultured; s__uncultured bacterium	0.7873	0.0038	0	0.0422	0	0.0308	0	0	0	0	0	0	0	0	0	0
146	p__Proteobacteria; c__Gammaproteobacteria; o__Betaproteobacteriales; f__Hydrogenophilaceae; g__Hydrogenophilus; s__taxa	0.4916	0.3993	0	0.1958	0	1.4041	0	0	0	0	0.0077	0	0.0038	0	0.0499	0
147	p__Proteobacteria; c__Gammaproteobacteria; o__Enterobacteriales; f__Enterobacteriaceae; g__Enterobacter; s__Enterobacter cloacae	0	0	0.0077	0	0.0038	0	0	0.0115	0.0115	3.2656	0.023	0	0.5986	0.0499	0	0.0461
148	p__Proteobacteria; c__Gammaproteobacteria; o__Enterobacteriales; f__Enterobacteriaceae; g__Enterobacter; s__taxa	0	0	0	0	0	0	0	0	0	1.8902	0	0	0.0115	0	0	0.0038
149	p__Proteobacteria; c__Gammaproteobacteria; o__Enterobacteriales; f__Enterobacteriaceae; g__Escherichia-Shigella; s__Escherichia coli	0	0.0307	0.2956	0.0115	0.0269	0.0038	0.0192	1.1892	0.0844	0	0.023	0.0691	3.1736	0.1267	0.6944	0.2457
150	p__Proteobacteria; c__Gammaproteobacteria; o__Enterobacteriales; f__Enterobacteriaceae; g__Escherichia-Shigella; s__uncultured bacterium	0	0	0	0	0	0	0	0	1.4502	0	0	0	0	0	0	0
151	p__Proteobacteria; c__Gammaproteobacteria; o__Enterobacteriales; f__Enterobacteriaceae; g__Gibbsiella; s__taxa	0	0	1.5704	0	1.5367	0	1.7924	0	0	0	1.5778	0.0077	0.0153	0.0115	0	0.1612
152	p__Proteobacteria; c__Gammaproteobacteria; o__Enterobacteriales; f__Enterobacteriaceae; g__Klebsiella; s__Klebsiella oxytoca	0	0	0.0077	0.0269	0	0	0	0.3836	0.0307	92.2548	0	0	0.0767	0.284	0	0.2725
153	p__Proteobacteria; c__Gammaproteobacteria; o__Enterobacteriales; f__Enterobacteriaceae; g__Klebsiella; s__Klebsiella pneumoniae	0	0	0.023	0	0	0	0	0	0	0.0038	0	0	0.9363	0	0	0
154	p__Proteobacteria; c__Gammaproteobacteria; o__Enterobacteriales; f__Enterobacteriaceae; g__Klebsiella; s__taxa	0.0077	0.0038	0.0115	0	0.0077	0	0	0.0882	0.023	0.0038	0	0.0115	0.5449	0.0269	0	0.0115
155	p__Proteobacteria; c__Gammaproteobacteria; o__Enterobacteriales; f__Enterobacteriaceae; g__Raoultella; s__Raoultella ornithinolytica	0	0	0	0	0	0	0	0	0.844	0	0	0	0.0038	0	0	0
156	p__Proteobacteria; c__Gammaproteobacteria; o__Enterobacteriales; f__Enterobacteriaceae; g__Serratia; s__Serratia nematodiphila	0	0	0	0.023	0.0115	0	0	0	0	0	0	0	0	0.0154	0	1.0249
157	p__Proteobacteria; c__Gammaproteobacteria; o__Enterobacteriales; f__Enterobacteriaceae; g__Serratia; s__Serratia proteamaculans	0	0	1.052	0	0	0	0.0115	0	0	0	0	0	0	0.6602	0	0
158	p__Proteobacteria; c__Gammaproteobacteria; o__Enterobacteriales; f__Enterobacteriaceae; g__Serratia; s__taxa	0	0.0038	84.7917	0	96.7728	0	94.4538	0.1381	0	0.6032	91.2895	94.7265	0.6792	78.9276	0.0614	46.3189
159	p__Proteobacteria; c__Gammaproteobacteria; o__Enterobacteriales; f__Enterobacteriaceae; g__Serratia; s__uncultured bacterium	0	0	0.0422	0	0.242	0	0.2073	0	0	0	0.0921	0.3418	0.0038	0.0038	0.0038	0.0653
160	p__Proteobacteria; c__Gammaproteobacteria; o__Enterobacteriales; f__Enterobacteriaceae; g__Serratia; s__uncultured Rahnella sp.	0	0	0.2956	0	0.2075	0	0.2456	0	0	0	0.2918	0.1767	0	0.2149	0	40.7569
161	p__Proteobacteria; c__Gammaproteobacteria; o__Pseudomonadales; f__Moraxellaceae; g__Acinetobacter; s__Acinetobacter junii	0.0538	0.0845	0	0.0307	0	0.0462	0	0.2916	1.0397	0	0.0038	0.0115	0	0.0115	0.0038	0
162	p__Proteobacteria; c__Gammaproteobacteria; o__Pseudomonadales; f__Moraxellaceae; g__Acinetobacter; s__Acinetobacter sp. IGCAR-9/07	0.2612	0.0307	0	0.0614	0	0.4193	0	0.0192	0.0537	0	0	0	0.0652	0	0	0
163	p__Proteobacteria; c__Gammaproteobacteria; o__Pseudomonadales; f__Moraxellaceae; g__Acinetobacter; s__taxa	0.361	2.9988	0	0.2995	0.0038	7.0706	0.0077	1.7493	2.7547	0.0307	0.096	0.0346	0.3761	0.1113	0.2263	0.0384
164	p__Proteobacteria; c__Gammaproteobacteria; o__Pseudomonadales; f__Moraxellaceae; g__Acinetobacter; s__uncultured Acinetobacter sp.	1.133	1.102	0.0038	0.6527	0	0.5655	0	0.2685	1.2277	0.0038	0.0077	0.0346	0.1228	0.0653	0.0269	0.0038
165	p__Proteobacteria; c__Gammaproteobacteria; o__Pseudomonadales; f__Moraxellaceae; g__Acinetobacter; s__uncultured bacterium	4.6856	0.3149	0.0038	1.7124	0	1.0887	0.0077	0.0997	0.142	0.0038	0.0614	0.0038	0.4106	0.023	0.0038	0.0038
166	p__Proteobacteria; c__Gammaproteobacteria; o__Pseudomonadales; f__Moraxellaceae; g__Acinetobacter; s__uncultured gamma proteobacterium	1.8474	1.2018	0	0.4914	0	3.4699	0	1.0128	0.8671	0	0	0	0.1957	0	0.0652	0.0038
167	p__Proteobacteria; c__Gammaproteobacteria; o__Pseudomonadales; f__Moraxellaceae; g__Perlucidibaca; s__taxa	0.1959	0.0192	0.0192	0.0038	0.0038	0	0	0.6061	0.0307	0	0	0.0077	0.0269	0.023	0.0882	0.023
168	p__Proteobacteria; c__Gammaproteobacteria; o__Pseudomonadales; f__Pseudomonadaceae; g__Pseudomonas; s__Pseudomonas aeruginosa	0.0115	0.0154	0	0.0077	0	0	0	0	0	0	0	0	1.4582	0	0	0
169	p__Proteobacteria; c__Gammaproteobacteria; o__Pseudomonadales; f__Pseudomonadaceae; g__Pseudomonas; s__taxa	0	0	0	0	0	0	0	1.8069	0	0	0	0	0	0	0	0
170	p__Proteobacteria; c__Gammaproteobacteria; o__Xanthomonadales; f__Xanthomonadaceae; g__Pseudoxanthomonas; s__taxa	0.3111	0.1037	0	0	0	0.6001	0	0.0038	0.2762	0	0	0	0	0	0	0
171	p__Proteobacteria; c__Gammaproteobacteria; o__Xanthomonadales; f__Xanthomonadaceae; g__Stenotrophomonas; s__taxa	0.4071	0.1037	0	0.0269	0	0.2231	0	0	0	0	0	0	0	0	0.1381	0
172	p__Proteobacteria; c__Gammaproteobacteria; o__Xanthomonadales; f__Xanthomonadaceae; g__Thermomonas; s__uncultured bacterium	0.1575	0	0.0077	0	0	0	0	0.2072	0.3299	0.0038	0	0.0038	0	0.0077	0	0
173	p__Proteobacteria; c__Gammaproteobacteria; o__Xanthomonadales; f__Xanthomonadaceae; g__Xanthomonas; s__taxa	0	12.0296	0	0.238	0	0.0115	0	0	0	0	0	0	0	0	0	0
174	p__Proteobacteria; c__Gammaproteobacteria; o__Xanthomonadales; f__Xanthomonadaceae; g__Xanthomonas; s__Xanthomonas sacchari	0	10.6243	0	0	0	0	0	0	0	0	0	0	0	0	0	0
