# Supplementary material for: The Effect of Pine Wood Nematode Bursaphelenchus xylophilus (Steiner and Buhrer) Nickle on Intestinal Bacterial Community of Insect Vector Monochamus saltuarius (Coleoptera: Cerambycidae)
Source: MDPI journal article supplement (doi:10.3390/f13101673), 2022-10-12
Supplement: s1 [file s1 › Supplementary Table S4.xlsx]

## Sheet: Sheet1
Supplementary Table S4. Summary of annotation imformation of node OTUs from biologically important modules in the phylogenetic co-occurrence networks of three categories
Sample	Module	OTU ID	Phylum	Class	Order	Family	Genus	Species
EI	Module 1	OTU-9	Firmicutes	Clostridia	Clostridiales	Ruminococcaceae	Butyricicoccus
	Module 1	OTU-10	Firmicutes	Erysipelotrichia	Erysipelotrichales	Erysipelotrichaceae	Catenibacterium
	Module 1	OTU-17	Firmicutes	Negativicutes	Selenomonadales	Veillonellaceae	Dialister
	Module 1	OTU-25	Actinobacteria	Actinobacteria	Bifidobacteriales	Bifidobacteriaceae	Bifidobacterium
	Module 1	OTU-34	Firmicutes	Negativicutes	Selenomonadales	Acidaminococcaceae	Phascolarctobacterium
	Module 1	OTU-35	Bacteroidetes	Bacteroidia	Bacteroidales	Prevotellaceae	Prevotella 9
	Module 1	OTU-38	Bacteroidetes	Bacteroidia	Bacteroidales	Bacteroidaceae	Bacteroides
	Module 1	OTU-42	Firmicutes	Clostridia	Clostridiales	Lachnospiraceae	Dorea	Dorea formicigenerans ATCC 27755
	Module 1	OTU-66	Firmicutes	Clostridia	Clostridiales	Ruminococcaceae	Ruminococcaceae UCG-002
	Module 1	OTU-89	Firmicutes	Clostridia	Clostridiales	Ruminococcaceae	Butyricicoccus
	Module 1	OTU-95	Firmicutes	Erysipelotrichia	Erysipelotrichales	Erysipelotrichaceae	Holdemanella
	Module 1	OTU-103	Firmicutes	Negativicutes	Selenomonadales	Acidaminococcaceae	Phascolarctobacterium
	Module 1	OTU-115	Bacteroidetes	Bacteroidia	Bacteroidales	Prevotellaceae	Alloprevotella	Prevotellamassilia timonensis
	Module 1	OTU-118	Firmicutes	Clostridia	Clostridiales	Lachnospiraceae	Blautia
	Module 1	OTU-122	Firmicutes	Clostridia	Clostridiales	Lachnospiraceae	Blautia
	Module 1	OTU-133	Firmicutes	Clostridia	Clostridiales	Lachnospiraceae	Lachnoclostridium
	Module 1	OTU-137	Firmicutes	Clostridia	Clostridiales	Ruminococcaceae	Faecalibacterium	Trichuris trichiura (human whipworm)
	Module 1	OTU-138	Bacteroidetes	Bacteroidia	Bacteroidales	Prevotellaceae	Prevotella 9
	Module 1	OTU-145	Firmicutes	Clostridia	Clostridiales	Ruminococcaceae	Subdoligranulum
	Module 1	OTU-146	Firmicutes	Clostridia	Clostridiales	Lachnospiraceae	[Eubacterium] hallii group
	Module 1	OTU-148	Bacteroidetes	Bacteroidia	Bacteroidales	Prevotellaceae	Prevotella 2
	Module 1	OTU-150	Bacteroidetes	Bacteroidia	Bacteroidales	Prevotellaceae	Prevotella 9
	Module 1	OTU-157	Firmicutes	Clostridia	Clostridiales	Lachnospiraceae	Agathobacter
	Module 1	OTU-159	Firmicutes	Clostridia	Clostridiales	Lachnospiraceae	Lachnoclostridium
	Module 1	OTU-162	Firmicutes	Clostridia	Clostridiales	Lachnospiraceae	Dorea
	Module 1	OTU-164	Firmicutes	Negativicutes	Selenomonadales	Veillonellaceae	Megamonas
	Module 1	OTU-166	Actinobacteria	Actinobacteria	Bifidobacteriales	Bifidobacteriaceae	Bifidobacterium
	Module 1	OTU-186	Firmicutes	Clostridia	Clostridiales	Lachnospiraceae	[Eubacterium] ruminantium group
	Module 1	OTU-191	Firmicutes	Clostridia	Clostridiales	Lachnospiraceae	Blautia
	Module 1	OTU-193	Firmicutes	Clostridia	Clostridiales	Ruminococcaceae	Subdoligranulum
	Module 1	OTU-197	Firmicutes	Clostridia	Clostridiales	Lachnospiraceae	[Ruminococcus] torques group
	Module 1	OTU-201	Firmicutes	Erysipelotrichia	Erysipelotrichales	Erysipelotrichaceae	Erysipelotrichaceae UCG-003	bacterium LF-3
	Module 1	OTU-206	Firmicutes	Clostridia	Clostridiales	Lachnospiraceae	Fusicatenibacter	Fusicatenibacter saccharivorans
	Module 1	OTU-214	Actinobacteria	Coriobacteriia	Coriobacteriales	Eggerthellaceae	Senegalimassilia
	Module 1	OTU-218	Firmicutes	Clostridia	Clostridiales	Ruminococcaceae	Ruminococcus 1	Ruminococcus sp. UNK.MGS-30
	Module 2	OTU-7	Bacteroidetes	Bacteroidia	Bacteroidales	Prevotellaceae	Alloprevotella
	Module 2	OTU-11	Firmicutes	Bacilli	Lactobacillales	Streptococcaceae	Streptococcus	Streptococcus thermophilus TH1435
	Module 2	OTU-99	Firmicutes	Clostridia	Clostridiales	Lachnospiraceae	Coprococcus 2
	Module 2	OTU-129	Firmicutes	Erysipelotrichia	Erysipelotrichales	Erysipelotrichaceae	Holdemanella
	Module 2	OTU-135	Firmicutes	Negativicutes	Selenomonadales	Veillonellaceae	Dialister
	Module 2	OTU-189	Firmicutes	Bacilli	Lactobacillales	Lactobacillaceae	Lactobacillus
	Module 2	OTU-208	Firmicutes	Bacilli	Lactobacillales	Streptococcaceae	Streptococcus
	Module 2	OTU-221	Firmicutes	Clostridia	Clostridiales	Lachnospiraceae	[Eubacterium] eligens group	[Eubacterium] eligens ATCC 27
	Module 3	OTU-50	Bacteroidetes	Bacteroidia	Bacteroidales	Prevotellaceae	Prevotella 9
	Module 3	OTU-134	Bacteroidetes	Bacteroidia	Bacteroidales	Prevotellaceae	Prevotella 2
	Module 3	OTU-167	Firmicutes	Clostridia	Clostridiales	Lachnospiraceae	Lachnospira
	Module 3	OTU-182	Firmicutes	Bacilli	Lactobacillales	Streptococcaceae	Streptococcus
	Module 4	OTU-16	Bacteroidetes	Bacteroidia	Flavobacteriales	Weeksellaceae	Chryseobacterium
	Module 4	OTU-23	Proteobacteria	Gammaproteobacteria	Betaproteobacteriales	Burkholderiaceae	Tepidimonas
	Module 4	OTU-29	Proteobacteria	Gammaproteobacteria	Pseudomonadales	Moraxellaceae	Acinetobacter
	Module 4	OTU-31	Firmicutes	Bacilli	Lactobacillales	Lactobacillaceae	Lactobacillus	Lactobacillus pentosus
	Module 4	OTU-33	Proteobacteria	Gammaproteobacteria	Enterobacteriales	Enterobacteriaceae	Serratia
	Module 4	OTU-48	Proteobacteria	Alphaproteobacteria	Rhodobacterales	Rhodobacteraceae	Gemmobacter
	Module 4	OTU-80	Firmicutes	Bacilli	Lactobacillales	Leuconostocaceae	Weissella
	Module 4	OTU-83	Proteobacteria	Alphaproteobacteria	Caulobacterales	Caulobacteraceae	Brevundimonas
	Module 4	OTU-87	Proteobacteria	Gammaproteobacteria	Xanthomonadales	Xanthomonadaceae	Pseudoxanthomonas
	Module 4	OTU-152	Proteobacteria	Alphaproteobacteria	Rhodobacterales	Rhodobacteraceae	Paracoccus
	Module 4	OTU-163	Proteobacteria	Gammaproteobacteria	Betaproteobacteriales	Hydrogenophilaceae	Hydrogenophilus
	Module 4	OTU-169	Proteobacteria	Gammaproteobacteria	Betaproteobacteriales	Burkholderiaceae	Ralstonia
	Module 4	OTU-200	Proteobacteria	Gammaproteobacteria	Pseudomonadales	Moraxellaceae	Acinetobacter
MH	Module 1	OTU-9	Firmicutes	Clostridia	Clostridiales	Ruminococcaceae	Butyricicoccus
	Module 1	OTU-10	Firmicutes	Erysipelotrichia	Erysipelotrichales	Erysipelotrichaceae	Catenibacterium
	Module 1	OTU-17	Firmicutes	Negativicutes	Selenomonadales	Veillonellaceae	Dialister
	Module 1	OTU-25	Actinobacteria	Actinobacteria	Bifidobacteriales	Bifidobacteriaceae	Bifidobacterium
	Module 1	OTU-34	Firmicutes	Negativicutes	Selenomonadales	Acidaminococcaceae	Phascolarctobacterium
	Module 1	OTU-35	Bacteroidetes	Bacteroidia	Bacteroidales	Prevotellaceae	Prevotella 9
	Module 1	OTU-38	Bacteroidetes	Bacteroidia	Bacteroidales	Bacteroidaceae	Bacteroides
	Module 1	OTU-42	Firmicutes	Clostridia	Clostridiales	Lachnospiraceae	Dorea	Dorea formicigenerans ATCC 27755
	Module 1	OTU-66	Firmicutes	Clostridia	Clostridiales	Ruminococcaceae	Ruminococcaceae UCG-002
	Module 1	OTU-89	Firmicutes	Clostridia	Clostridiales	Ruminococcaceae	Butyricicoccus
	Module 1	OTU-95	Firmicutes	Erysipelotrichia	Erysipelotrichales	Erysipelotrichaceae	Holdemanella
	Module 1	OTU-103	Firmicutes	Negativicutes	Selenomonadales	Acidaminococcaceae	Phascolarctobacterium
	Module 1	OTU-115	Bacteroidetes	Bacteroidia	Bacteroidales	Prevotellaceae	Alloprevotella	Prevotellamassilia timonensis
	Module 1	OTU-118	Firmicutes	Clostridia	Clostridiales	Lachnospiraceae	Blautia
	Module 1	OTU-122	Firmicutes	Clostridia	Clostridiales	Lachnospiraceae	Blautia
	Module 1	OTU-133	Firmicutes	Clostridia	Clostridiales	Lachnospiraceae	Lachnoclostridium
	Module 1	OTU-137	Firmicutes	Clostridia	Clostridiales	Ruminococcaceae	Faecalibacterium	Trichuris trichiura (human whipworm)
	Module 1	OTU-138	Bacteroidetes	Bacteroidia	Bacteroidales	Prevotellaceae	Prevotella 9
	Module 1	OTU-145	Firmicutes	Clostridia	Clostridiales	Ruminococcaceae	Subdoligranulum
	Module 1	OTU-146	Firmicutes	Clostridia	Clostridiales	Lachnospiraceae	[Eubacterium] hallii group
	Module 1	OTU-148	Bacteroidetes	Bacteroidia	Bacteroidales	Prevotellaceae	Prevotella 2
	Module 1	OTU-150	Bacteroidetes	Bacteroidia	Bacteroidales	Prevotellaceae	Prevotella 9
	Module 1	OTU-157	Firmicutes	Clostridia	Clostridiales	Lachnospiraceae	Agathobacter
	Module 1	OTU-159	Firmicutes	Clostridia	Clostridiales	Lachnospiraceae	Lachnoclostridium
	Module 1	OTU-162	Firmicutes	Clostridia	Clostridiales	Lachnospiraceae	Dorea
	Module 1	OTU-164	Firmicutes	Negativicutes	Selenomonadales	Veillonellaceae	Megamonas
	Module 1	OTU-166	Actinobacteria	Actinobacteria	Bifidobacteriales	Bifidobacteriaceae	Bifidobacterium
	Module 1	OTU-186	Firmicutes	Clostridia	Clostridiales	Lachnospiraceae	[Eubacterium] ruminantium group
	Module 1	OTU-191	Firmicutes	Clostridia	Clostridiales	Lachnospiraceae	Blautia
	Module 1	OTU-193	Firmicutes	Clostridia	Clostridiales	Ruminococcaceae	Subdoligranulum
	Module 1	OTU-197	Firmicutes	Clostridia	Clostridiales	Lachnospiraceae	[Ruminococcus] torques group
	Module 1	OTU-201	Firmicutes	Erysipelotrichia	Erysipelotrichales	Erysipelotrichaceae	Erysipelotrichaceae UCG-003	bacterium LF-3
	Module 1	OTU-206	Firmicutes	Clostridia	Clostridiales	Lachnospiraceae	Fusicatenibacter	Fusicatenibacter saccharivorans
	Module 1	OTU-214	Actinobacteria	Coriobacteriia	Coriobacteriales	Eggerthellaceae	Senegalimassilia
	Module 1	OTU-218	Firmicutes	Clostridia	Clostridiales	Ruminococcaceae	Ruminococcus 1	Ruminococcus sp. UNK.MGS-30
	Module 2	OTU-7	Bacteroidetes	Bacteroidia	Bacteroidales	Prevotellaceae	Alloprevotella
	Module 2	OTU-11	Firmicutes	Bacilli	Lactobacillales	Streptococcaceae	Streptococcus	Streptococcus thermophilus TH1435
	Module 2	OTU-99	Firmicutes	Clostridia	Clostridiales	Lachnospiraceae	Coprococcus 2
	Module 2	OTU-129	Firmicutes	Erysipelotrichia	Erysipelotrichales	Erysipelotrichaceae	Holdemanella
	Module 2	OTU-135	Firmicutes	Negativicutes	Selenomonadales	Veillonellaceae	Dialister
	Module 2	OTU-189	Firmicutes	Bacilli	Lactobacillales	Lactobacillaceae	Lactobacillus
	Module 2	OTU-208	Firmicutes	Bacilli	Lactobacillales	Streptococcaceae	Streptococcus
	Module 2	OTU-221	Firmicutes	Clostridia	Clostridiales	Lachnospiraceae	[Eubacterium] eligens group	[Eubacterium] eligens ATCC 27
MI	Module 1	OTU-9	Firmicutes	Clostridia	Clostridiales	Ruminococcaceae	Butyricicoccus
	Module 1	OTU-10	Firmicutes	Erysipelotrichia	Erysipelotrichales	Erysipelotrichaceae	Catenibacterium
	Module 1	OTU-17	Firmicutes	Negativicutes	Selenomonadales	Veillonellaceae	Dialister
	Module 1	OTU-25	Actinobacteria	Actinobacteria	Bifidobacteriales	Bifidobacteriaceae	Bifidobacterium
	Module 1	OTU-34	Firmicutes	Negativicutes	Selenomonadales	Acidaminococcaceae	Phascolarctobacterium
	Module 1	OTU-35	Bacteroidetes	Bacteroidia	Bacteroidales	Prevotellaceae	Prevotella 9
	Module 1	OTU-38	Bacteroidetes	Bacteroidia	Bacteroidales	Bacteroidaceae	Bacteroides
	Module 1	OTU-42	Firmicutes	Clostridia	Clostridiales	Lachnospiraceae	Dorea	Dorea formicigenerans ATCC 27755
	Module 1	OTU-66	Firmicutes	Clostridia	Clostridiales	Ruminococcaceae	Ruminococcaceae UCG-002
	Module 1	OTU-89	Firmicutes	Clostridia	Clostridiales	Ruminococcaceae	Butyricicoccus
	Module 1	OTU-95	Firmicutes	Erysipelotrichia	Erysipelotrichales	Erysipelotrichaceae	Holdemanella
	Module 1	OTU-103	Firmicutes	Negativicutes	Selenomonadales	Acidaminococcaceae	Phascolarctobacterium
	Module 1	OTU-115	Bacteroidetes	Bacteroidia	Bacteroidales	Prevotellaceae	Alloprevotella	Prevotellamassilia timonensis
	Module 1	OTU-118	Firmicutes	Clostridia	Clostridiales	Lachnospiraceae	Blautia
	Module 1	OTU-122	Firmicutes	Clostridia	Clostridiales	Lachnospiraceae	Blautia
	Module 1	OTU-133	Firmicutes	Clostridia	Clostridiales	Lachnospiraceae	Lachnoclostridium
	Module 1	OTU-137	Firmicutes	Clostridia	Clostridiales	Ruminococcaceae	Faecalibacterium	Trichuris trichiura (human whipworm)
	Module 1	OTU-138	Bacteroidetes	Bacteroidia	Bacteroidales	Prevotellaceae	Prevotella 9
	Module 1	OTU-145	Firmicutes	Clostridia	Clostridiales	Ruminococcaceae	Subdoligranulum
	Module 1	OTU-146	Firmicutes	Clostridia	Clostridiales	Lachnospiraceae	[Eubacterium] hallii group
	Module 1	OTU-148	Bacteroidetes	Bacteroidia	Bacteroidales	Prevotellaceae	Prevotella 2
	Module 1	OTU-150	Bacteroidetes	Bacteroidia	Bacteroidales	Prevotellaceae	Prevotella 9
	Module 1	OTU-157	Firmicutes	Clostridia	Clostridiales	Lachnospiraceae	Agathobacter
	Module 1	OTU-159	Firmicutes	Clostridia	Clostridiales	Lachnospiraceae	Lachnoclostridium
	Module 1	OTU-162	Firmicutes	Clostridia	Clostridiales	Lachnospiraceae	Dorea
	Module 1	OTU-164	Firmicutes	Negativicutes	Selenomonadales	Veillonellaceae	Megamonas
	Module 1	OTU-166	Actinobacteria	Actinobacteria	Bifidobacteriales	Bifidobacteriaceae	Bifidobacterium
	Module 1	OTU-186	Firmicutes	Clostridia	Clostridiales	Lachnospiraceae	[Eubacterium] ruminantium group
	Module 1	OTU-191	Firmicutes	Clostridia	Clostridiales	Lachnospiraceae	Blautia
	Module 1	OTU-193	Firmicutes	Clostridia	Clostridiales	Ruminococcaceae	Subdoligranulum
	Module 1	OTU-197	Firmicutes	Clostridia	Clostridiales	Lachnospiraceae	[Ruminococcus] torques group
	Module 1	OTU-201	Firmicutes	Erysipelotrichia	Erysipelotrichales	Erysipelotrichaceae	Erysipelotrichaceae UCG-003	bacterium LF-3
	Module 1	OTU-206	Firmicutes	Clostridia	Clostridiales	Lachnospiraceae	Fusicatenibacter	Fusicatenibacter saccharivorans
	Module 1	OTU-214	Actinobacteria	Coriobacteriia	Coriobacteriales	Eggerthellaceae	Senegalimassilia
	Module 1	OTU-218	Firmicutes	Clostridia	Clostridiales	Ruminococcaceae	Ruminococcus 1	Ruminococcus sp. UNK.MGS-30
	Module 2	OTU-7	Bacteroidetes	Bacteroidia	Bacteroidales	Prevotellaceae	Alloprevotella
	Module 2	OTU-11	Firmicutes	Bacilli	Lactobacillales	Streptococcaceae	Streptococcus	Streptococcus thermophilus TH1435
	Module 2	OTU-99	Firmicutes	Clostridia	Clostridiales	Lachnospiraceae	Coprococcus 2
	Module 2	OTU-129	Firmicutes	Erysipelotrichia	Erysipelotrichales	Erysipelotrichaceae	Holdemanella
	Module 2	OTU-135	Firmicutes	Negativicutes	Selenomonadales	Veillonellaceae	Dialister
	Module 2	OTU-189	Firmicutes	Bacilli	Lactobacillales	Lactobacillaceae	Lactobacillus
	Module 2	OTU-208	Firmicutes	Bacilli	Lactobacillales	Streptococcaceae	Streptococcus
	Module 2	OTU-221	Firmicutes	Clostridia	Clostridiales	Lachnospiraceae	[Eubacterium] eligens group	[Eubacterium] eligens ATCC 27
	Module 3	OTU-50	Bacteroidetes	Bacteroidia	Bacteroidales	Prevotellaceae	Prevotella 9
	Module 3	OTU-134	Bacteroidetes	Bacteroidia	Bacteroidales	Prevotellaceae	Prevotella 2
	Module 3	OTU-167	Firmicutes	Clostridia	Clostridiales	Lachnospiraceae	Lachnospira
	Module 3	OTU-182	Firmicutes	Bacilli	Lactobacillales	Streptococcaceae	Streptococcus
