# Supplementary material for: The Effect of Pine Wood Nematode Bursaphelenchus xylophilus (Steiner and Buhrer) Nickle on Intestinal Bacterial Community of Insect Vector Monochamus saltuarius (Coleoptera: Cerambycidae)
Source: MDPI journal article supplement (doi:10.3390/f13101673), 2022-10-12
Supplement: s1 [file s1 › Supplementary Table S5.xlsx]

## Sheet: EH
no.	taxa	mean	total	count
1	g__Acidothermus	27	27	1
2	g__Streptococcus	25	25	1
3	g__Hydrotalea	24	24	1
4	f__Beggiatoaceae	24	24	1
5	f__Xanthobacteraceae	22	44	2
6	c__KD4-96	21	21	1
7	g__Bacteroides	20	20	1
8	g__Peptoniphilus	20	20	1
9	g__Caviibacter	20	20	1
10	g__Peptostreptococcus	19	19	1
11	g__Paucibacter	19	19	1
12	g__Burkholderia-Caballeronia-Paraburkholderia	18.5	37	2
13	g__Porphyromonas	18	18	1
14	g__Helcococcus	18	18	1
15	g__Fusobacterium	18	18	1
16	g__Ralstonia	18	36	2

## Sheet: EI
no.	taxa	mean	total	count
1	g__Dorea	7.5	15	2
2	g__Serratia	7	7	1
3	g__Erysipelotrichaceae_UCG-003	6	6	1
4	g__Dialister	5	10	2
5	g__Eubacterium	4	8	2
6	g__Agathobacter	4	4	1
7	g__Fusicatenibacter	4	4	1
8	g__Gemmobacter	4	4	1
9	g__Ralstonia	4	4	1
10	g__Alloprevotella	3.5	7	2
11	g__Holdemanella	3.5	7	2
12	g__Phascolarctobacterium	3.5	7	2
13	g__Prevotella_9	3	12	4
14	g__Blautia	3	9	3
15	g__Ruminococcus_torques_group	3	3	1
16	g__Bifidobacterium	2.5	5	2
17	g__Butyricicoccus	2.5	5	2
18	g__Ruminococcaceae_UCG-002	2.5	5	2
19	g__Catenibacterium	2.5	5	2
20	g__Prevotella_2	2.3	7	3
21	g__Streptococcus	2.2	9	4

## Sheet: MH
no.	taxa	mean	total	count
1	g__Dorea	7.5	15	2
2	g__Erysipelotrichaceae_UCG-003	6	6	1
3	g__Holdemanella	5	5	1
4	g__Dialister	4.5	9	2
5	g__Agathobacter	4	4	1
6	g__Fusicatenibacter	4	4	1
7	g__Eubacterium	3.5	7	2
8	g__Alloprevotella	3.5	7	2
9	g__Phascolarctobacterium	3.5	7	2
10	g__Prevotella_9	3.3	10	3
11	g__Streptococcus	3	6	2
12	g__Blautia	3	9	3
13	g__Ruminococcus_torques_group	3	3	1

## Sheet: MI
no.	taxa	mean	total	count
1	g__Dorea	7.5	15	2
2	g__Erysipelotrichaceae_UCG-003	6	6	1
3	g__Dialister	5	10	2
4	g__Eubacterium	4	8	2
5	g__Agathobacter	4	4	1
6	g__Fusicatenibacter	4	4	1
7	g__Alloprevotella	3.5	7	2
8	g__Holdemanella	3.5	7	2
9	g__Phascolarctobacterium	3.5	7	2
10	g__Prevotella_9	3	12	4
11	g__Blautia	3	9	3
12	g__Bifidobacterium	2.5	5	2
13	g__Butyricicoccus	2.5	5	2
14	g__Ruminococcaceae_UCG-002	2.5	5	2
15	g__Catenibacterium	2.5	5	2
16	g__Prevotella_2	2.3	7	3
17	g__Streptococcus	2.3	7	3
